# Supplementary material for: Dynamic simulations of transcriptional control during cell reprogramming reveal spatial chromatin caging
Source: bioRxiv or medRxiv preprint supplement (doi:10.1101/642009), 2019-05-20
Supplement: Supplementary file [file media-1.pdf]

# CEBPa chr7:35119293-35121931. Forward

**a**

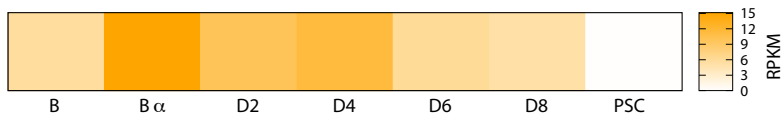

**b**

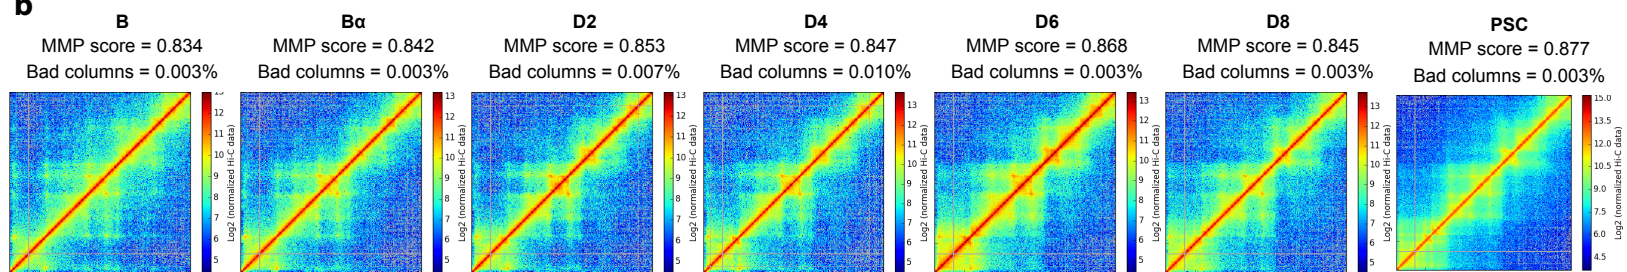

**c**

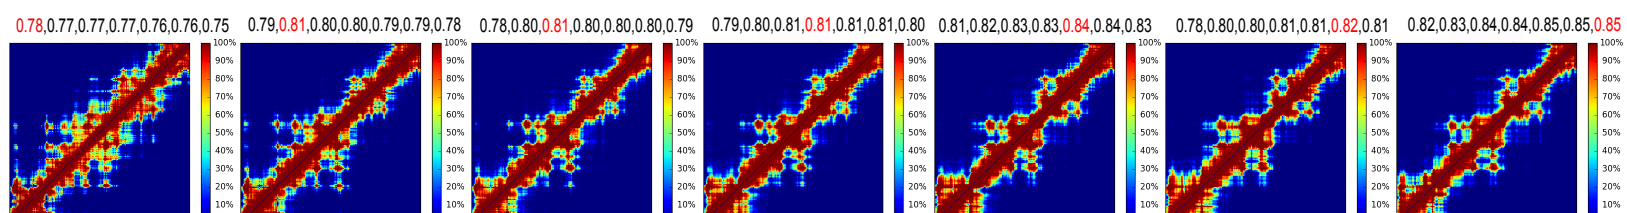

**d**

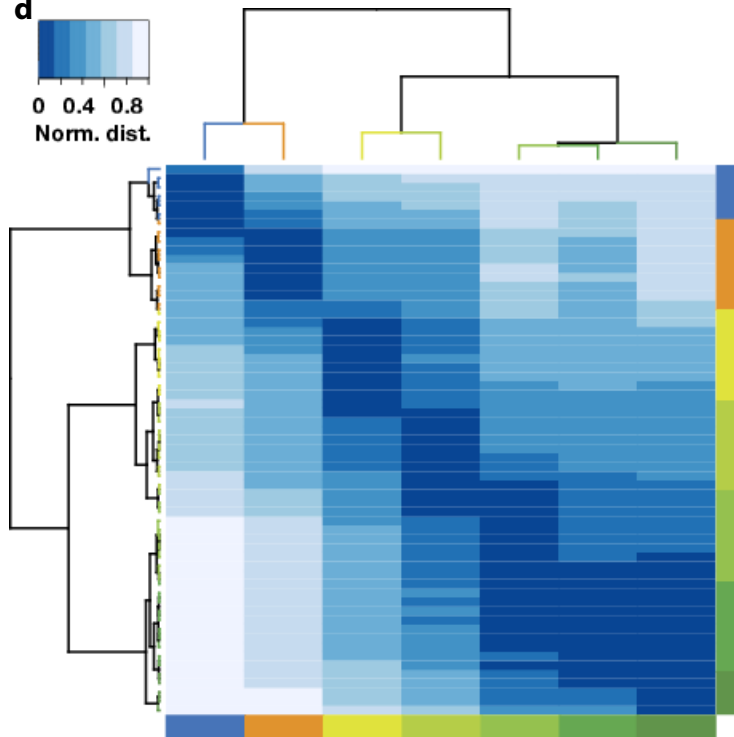

**e**

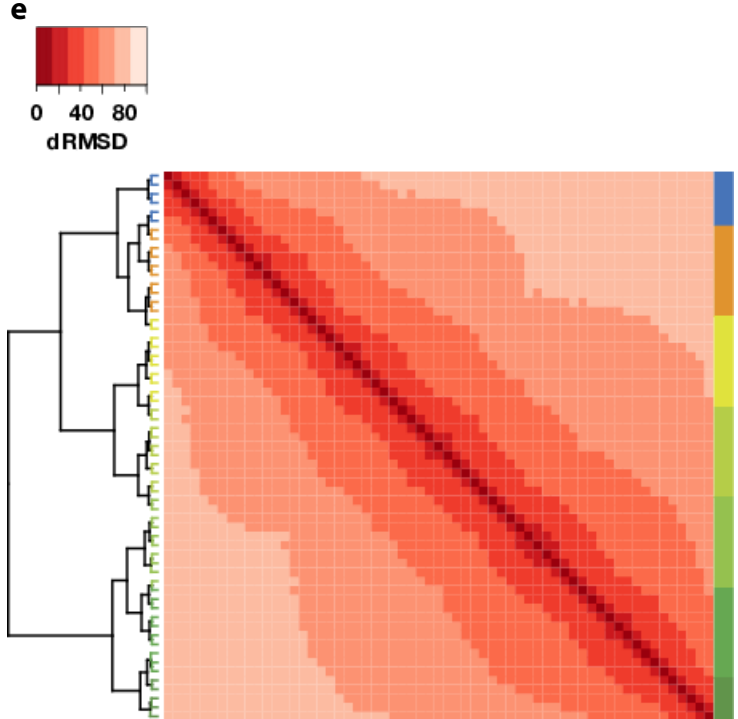

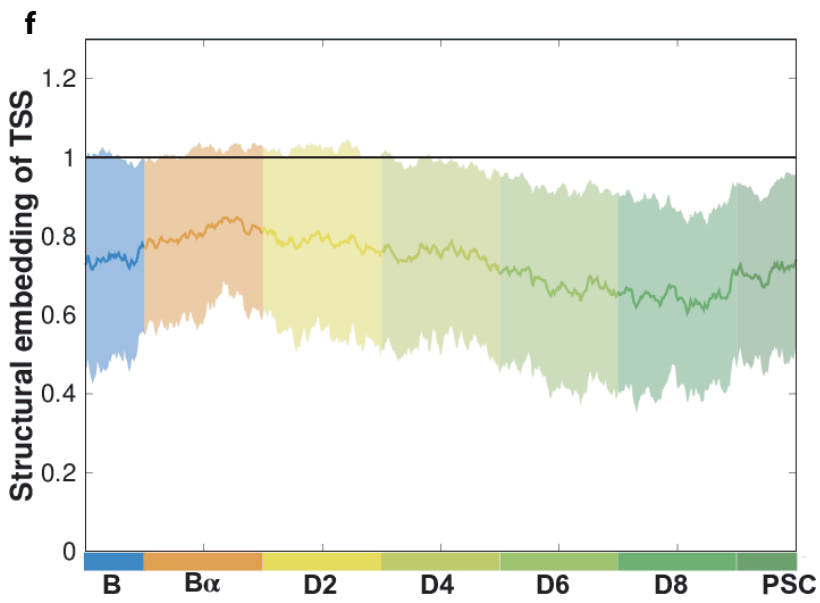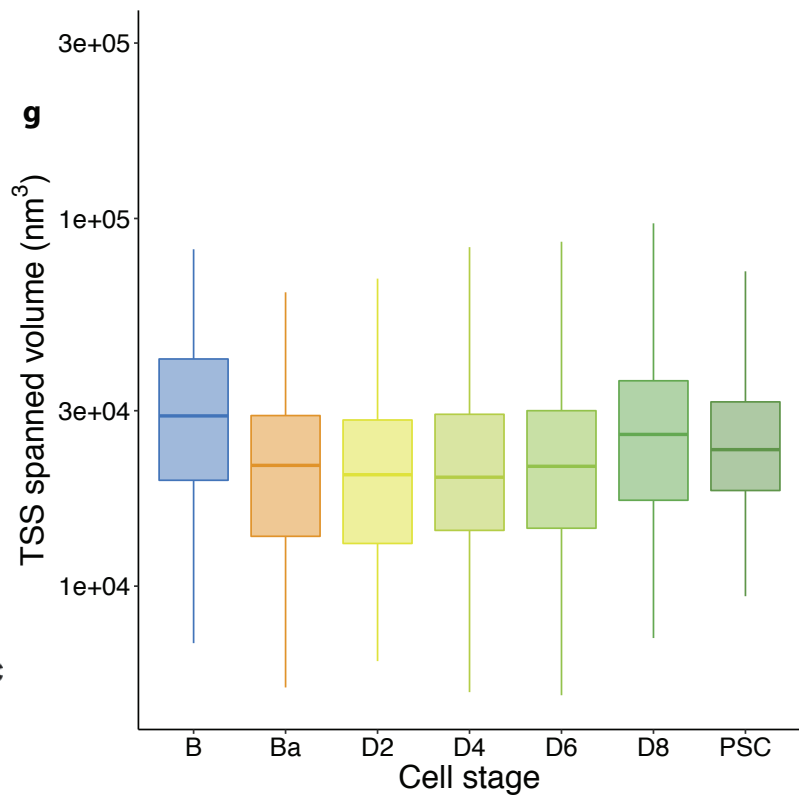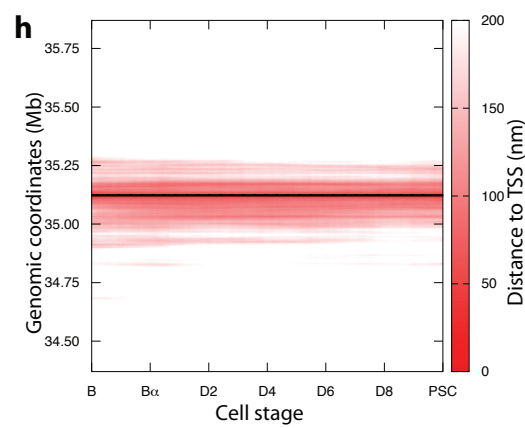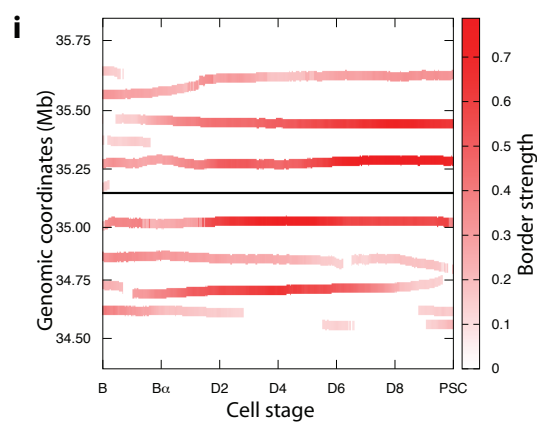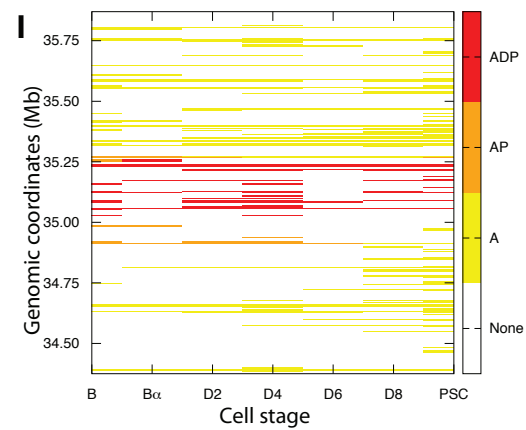

**m**

| TSS | B  | B $\alpha$ | D2 | D4 | D6 | D8 | PSC |
|-----|----|------------|----|----|----|----|-----|
| A   | 45 | 33         | 41 | 58 | 36 | 54 | 85  |
| AP  | 18 | 12         | 14 | 19 | 6  | 9  | 12  |
| APD | 10 | 7          | 11 | 16 | 5  | 9  | 11  |
