# Supplementary material for: Dynamic simulations of transcriptional control during cell reprogramming reveal spatial chromatin caging
Source: bioRxiv or medRxiv preprint supplement (doi:10.1101/642009), 2019-05-20
Supplement: Supplementary file [file media-2.pdf]

# Ebf1 chr11:44618100-45008096. Forward

**a**

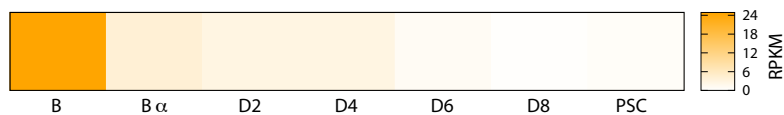

**b**

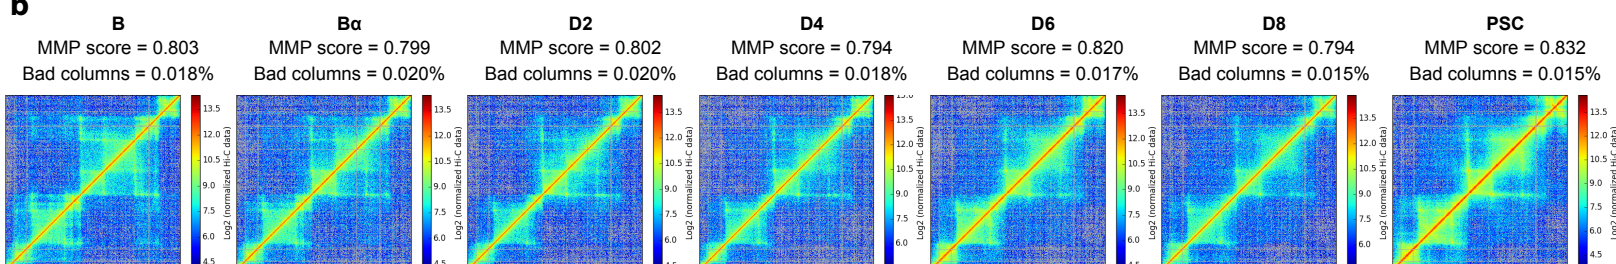

**c**

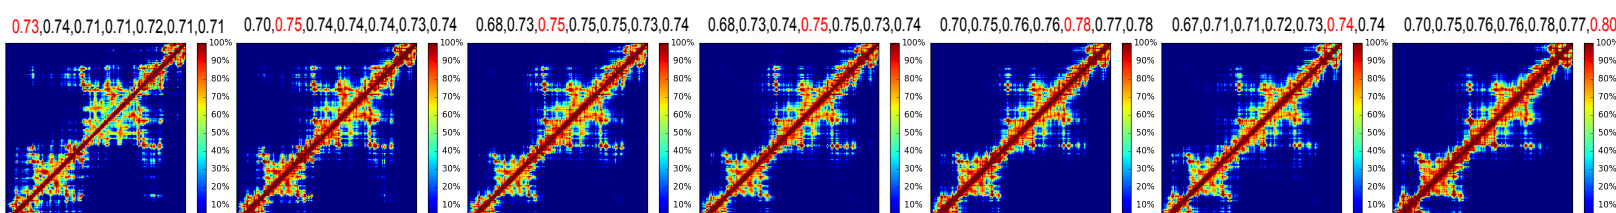

**d**

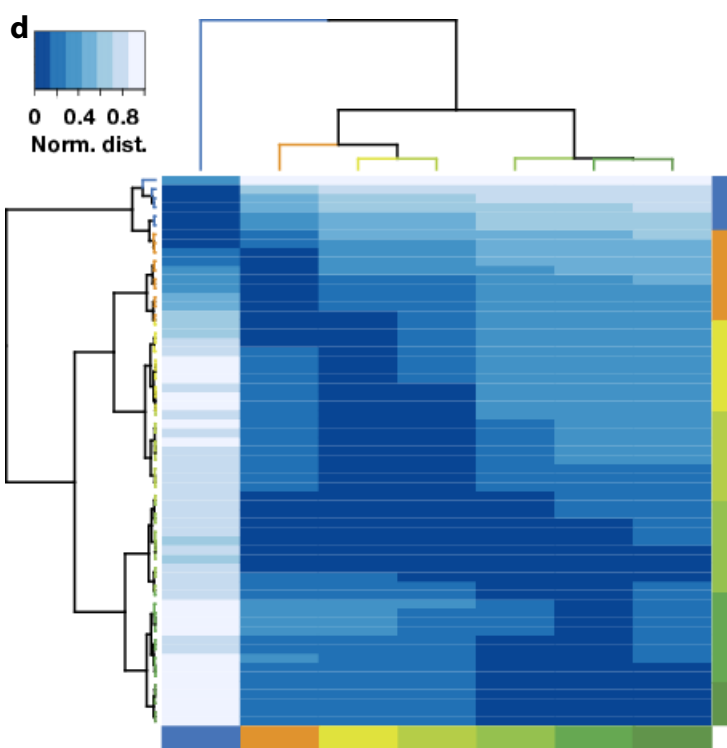

**e**

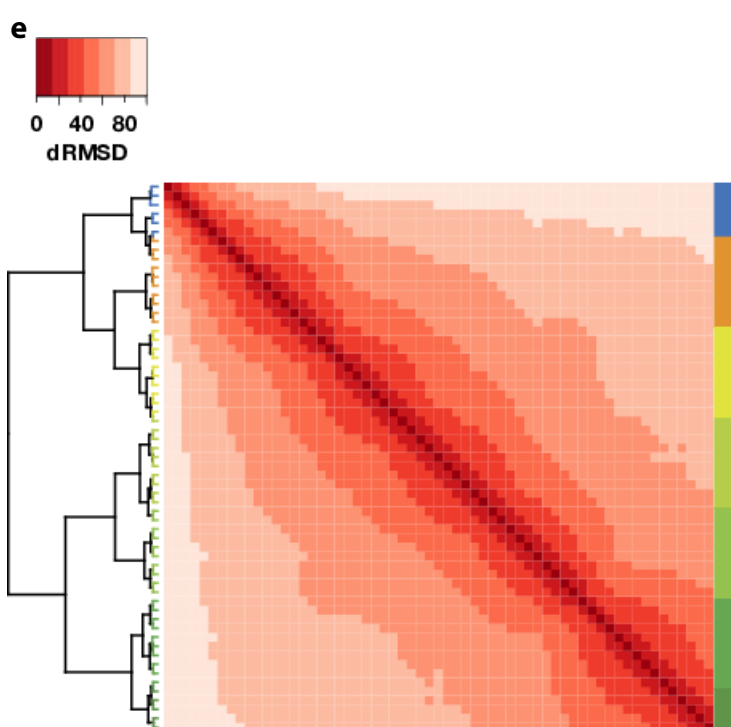

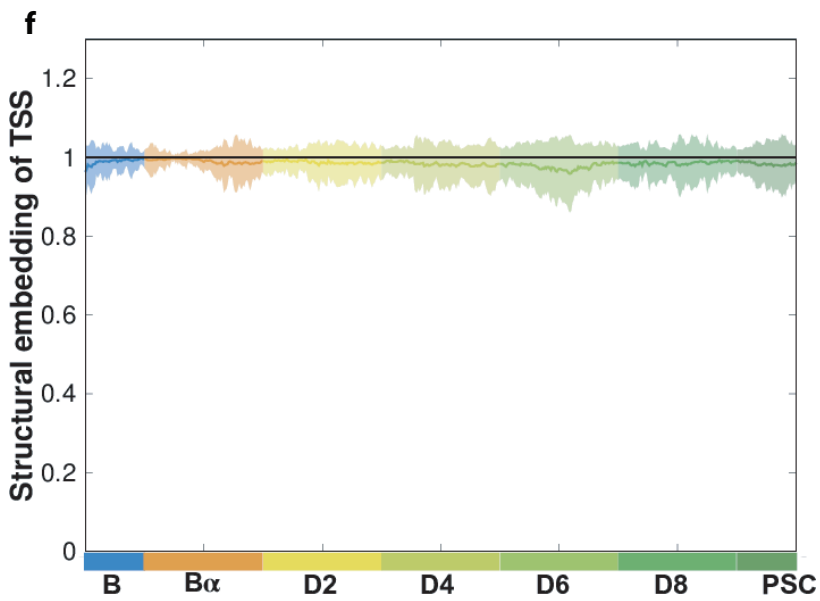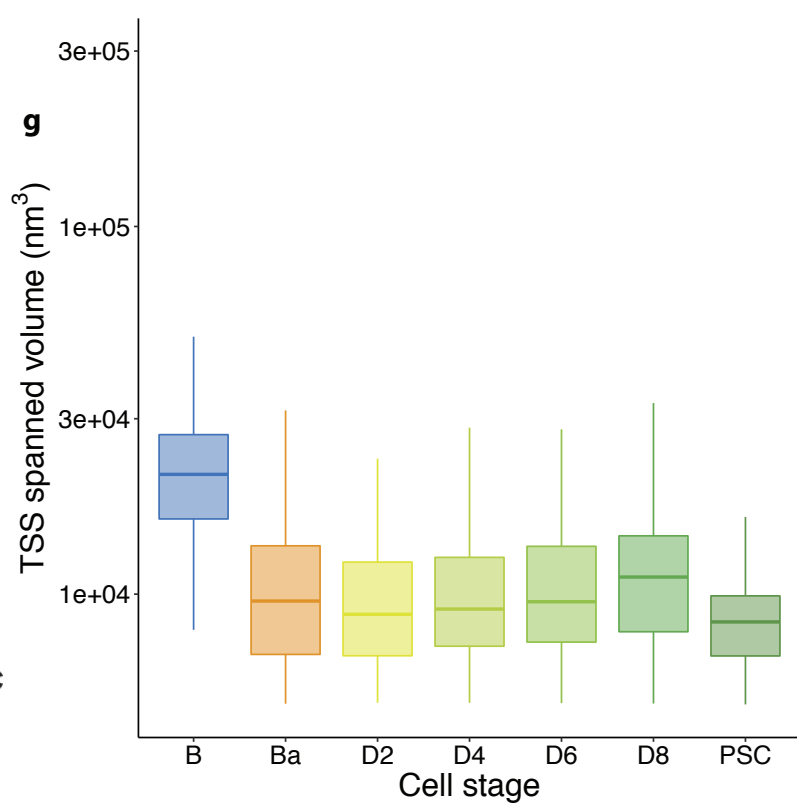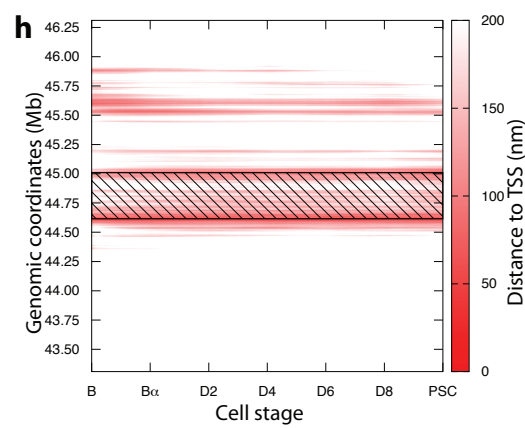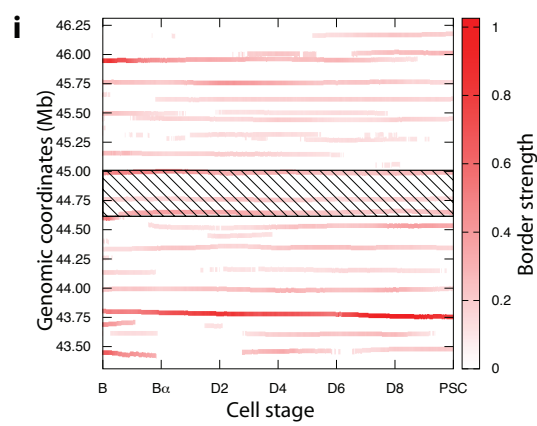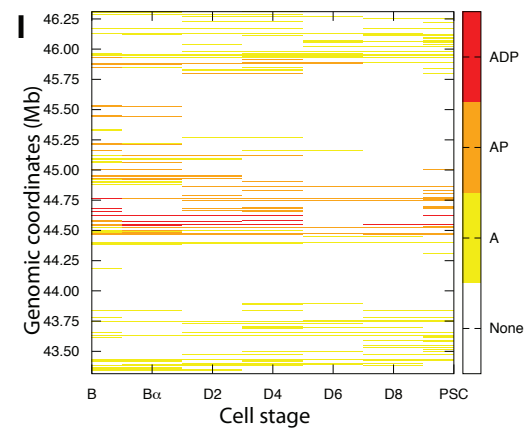

**m**

| TSS | B   | B $\alpha$ | D2 | D4  | D6 | D8 | PSC |
|-----|-----|------------|----|-----|----|----|-----|
| A   | 106 | 85         | 78 | 101 | 53 | 64 | 88  |
| AP  | 41  | 35         | 31 | 40  | 13 | 10 | 27  |
| APD | 7   | 8          | 5  | 6   | 1  | 2  | 3   |
