# Supplementary material for: Dynamic simulations of transcriptional control during cell reprogramming reveal spatial chromatin caging
Source: bioRxiv or medRxiv preprint supplement (doi:10.1101/642009), 2019-05-20
Supplement: Supplementary file [file media-3.pdf]

# Lmo7 chr14:101729957-101934710. Forward

**a**

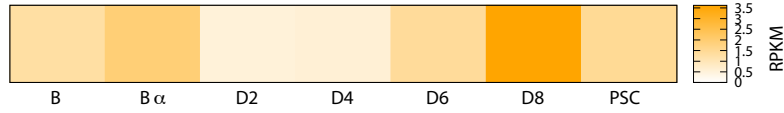

**b**

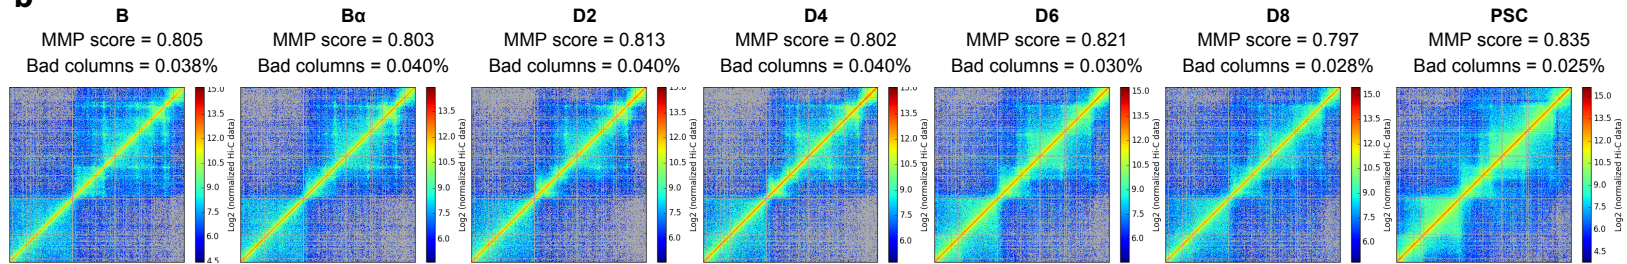

**c**

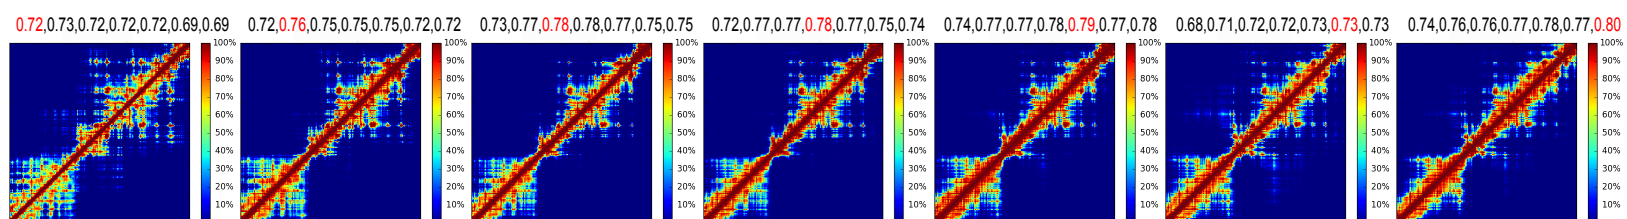

**d**

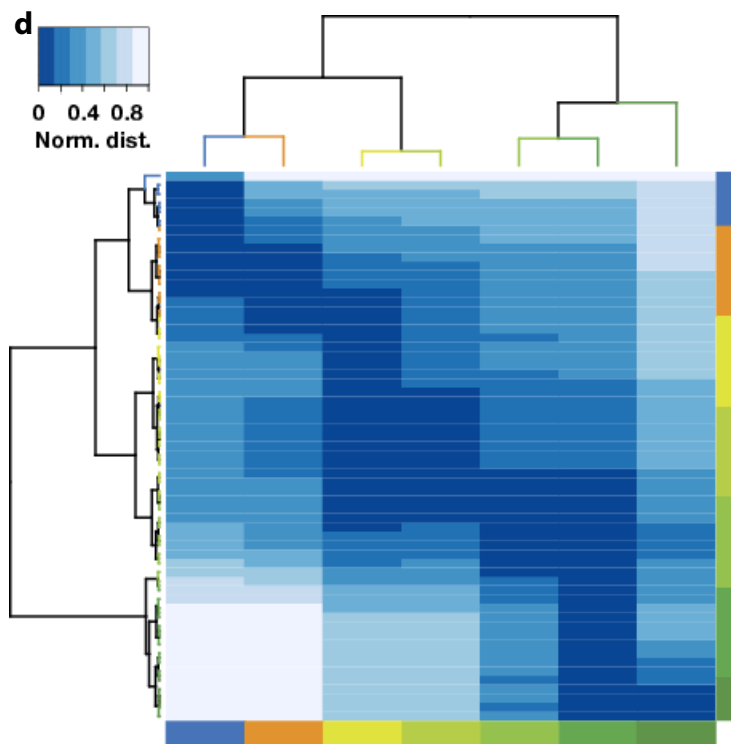

**e**

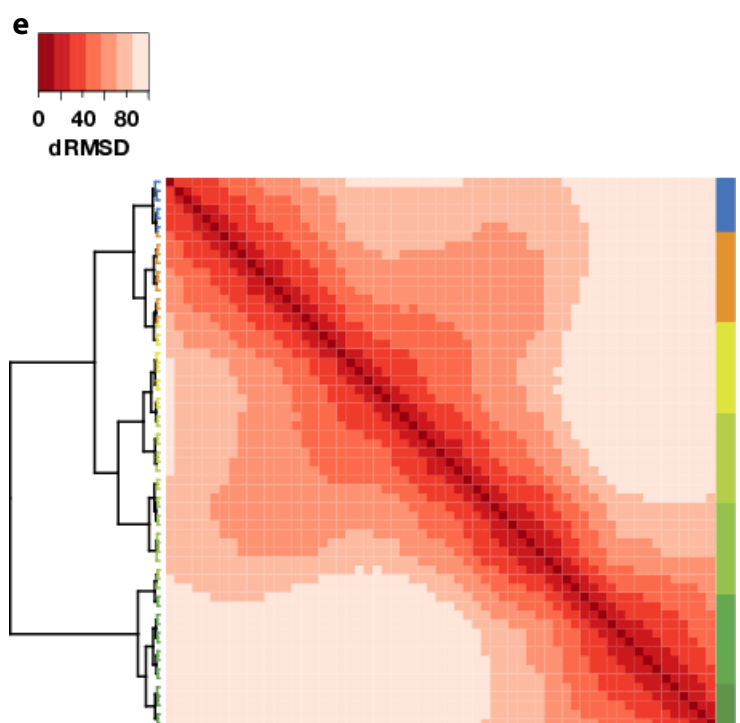

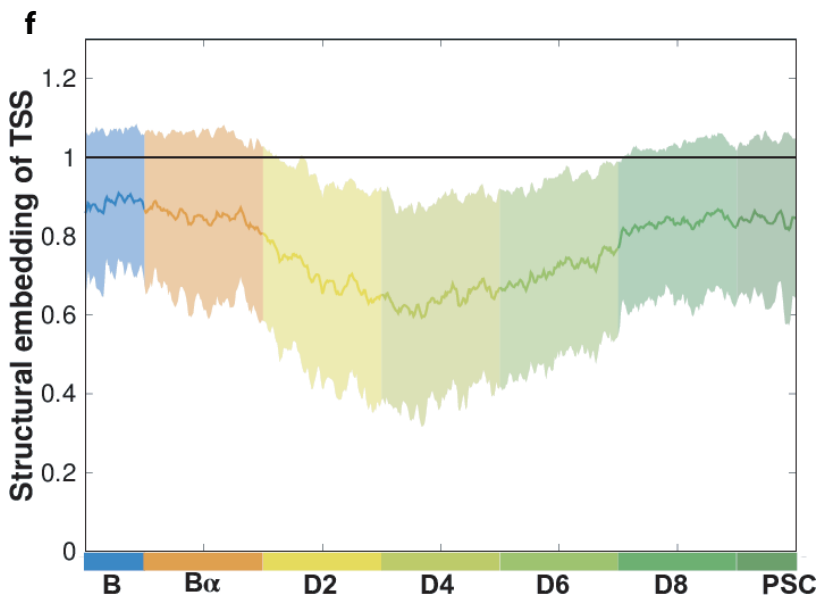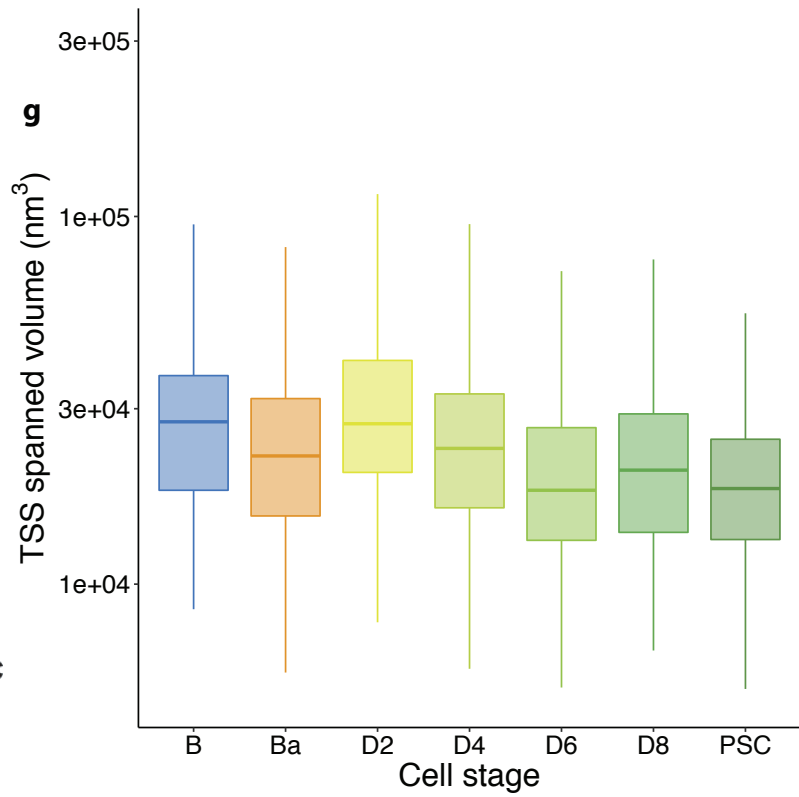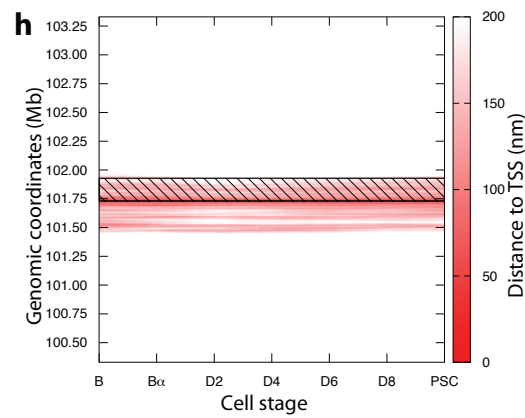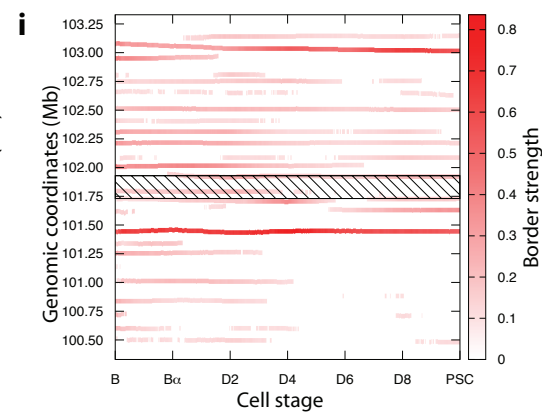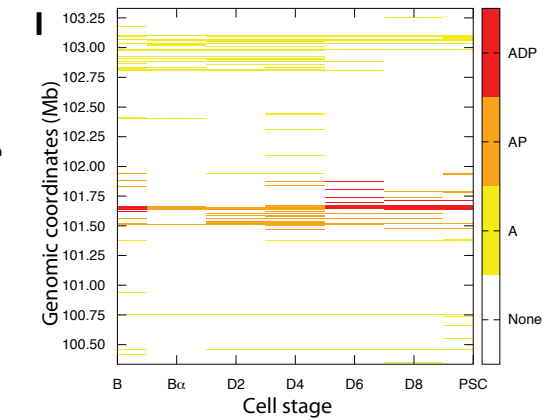

**m**

| TSS | B  | B $\alpha$ | D2 | D4 | D6 | D8 | PSC |
|-----|----|------------|----|----|----|----|-----|
| A   | 58 | 36         | 47 | 70 | 41 | 42 | 44  |
| AP  | 19 | 10         | 14 | 28 | 20 | 23 | 21  |
| APD | 7  | 1          | 1  | 2  | 15 | 9  | 10  |
