# Supplementary material for: Dynamic simulations of transcriptional control during cell reprogramming reveal spatial chromatin caging
Source: bioRxiv or medRxiv preprint supplement (doi:10.1101/642009), 2019-05-20
Supplement: Supplementary file [file media-4.pdf]

# Mmp3 chr9:7445822-7455975. Forward

**a**

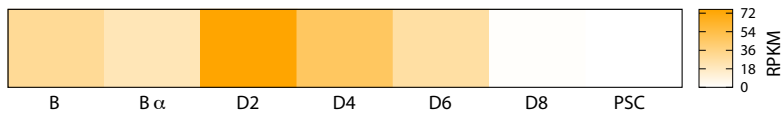

**b**

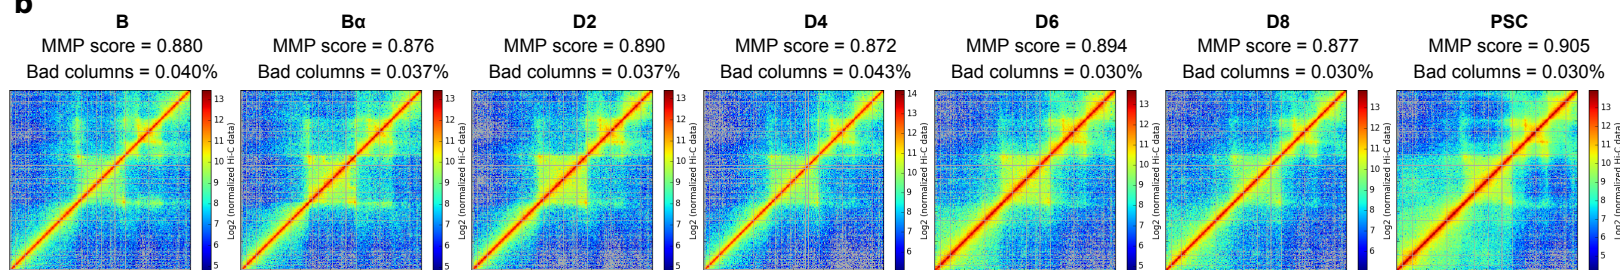

**c**

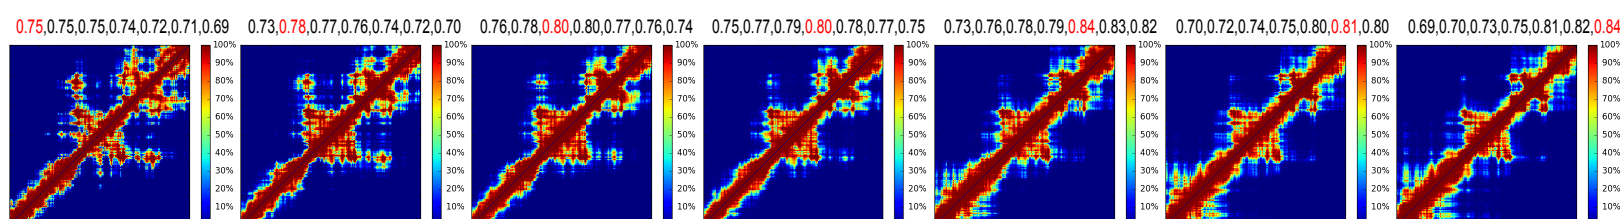

**d**

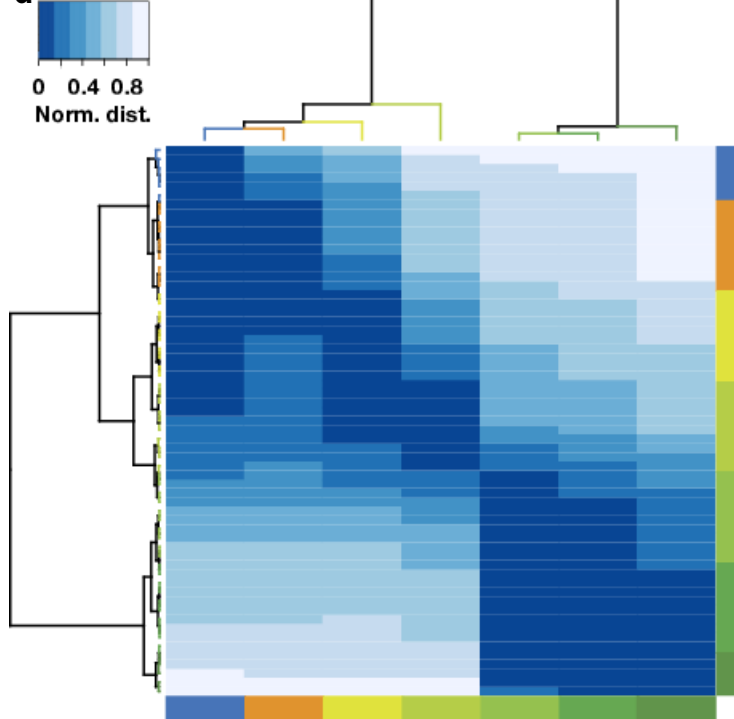

**e**

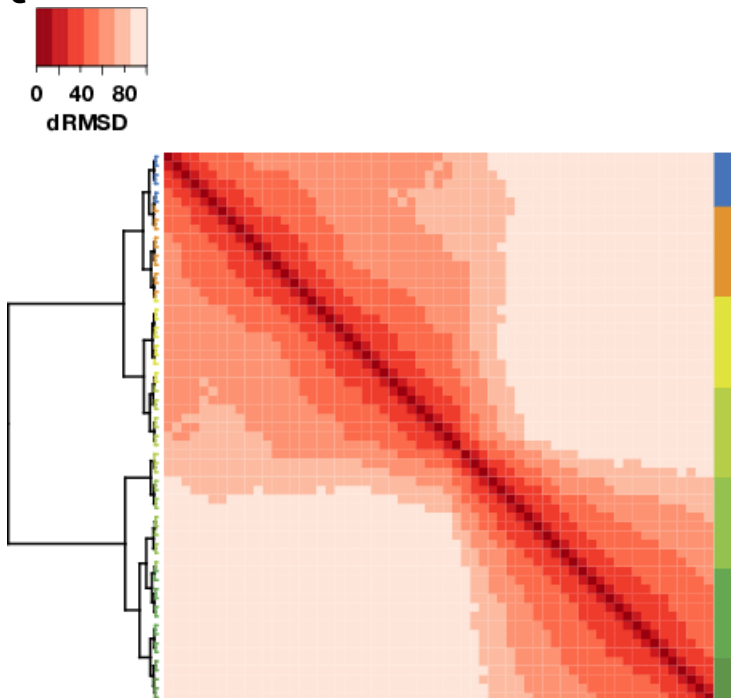

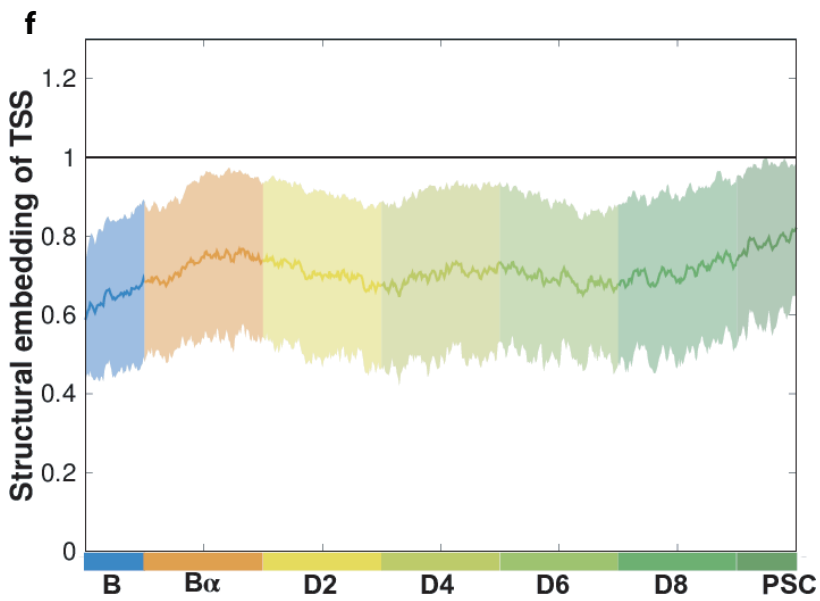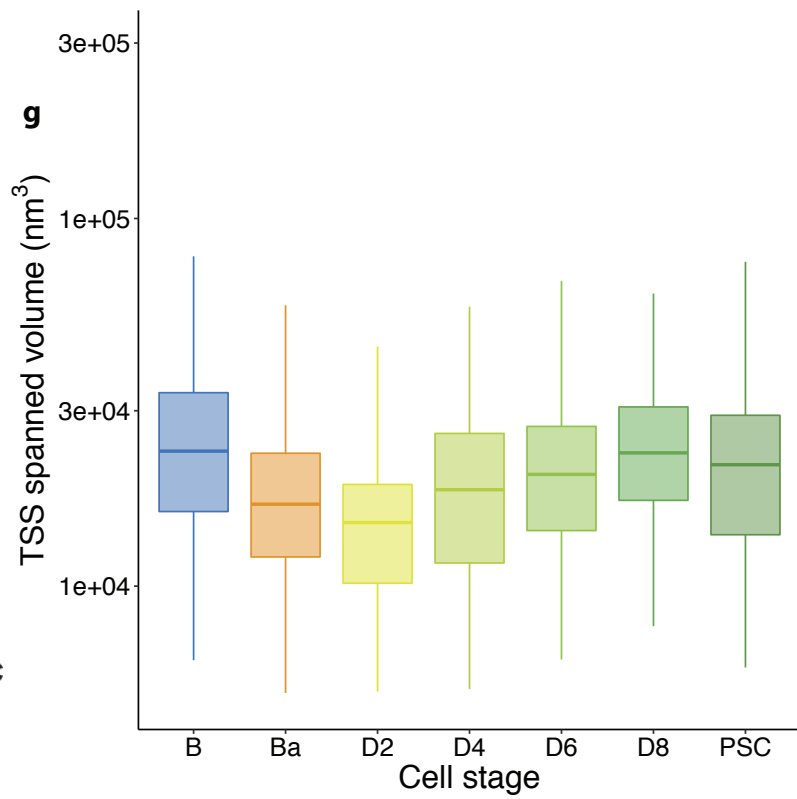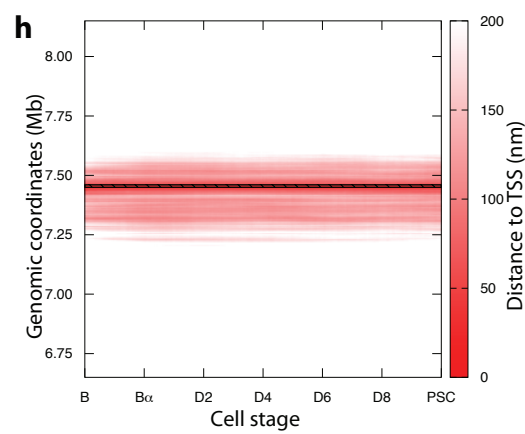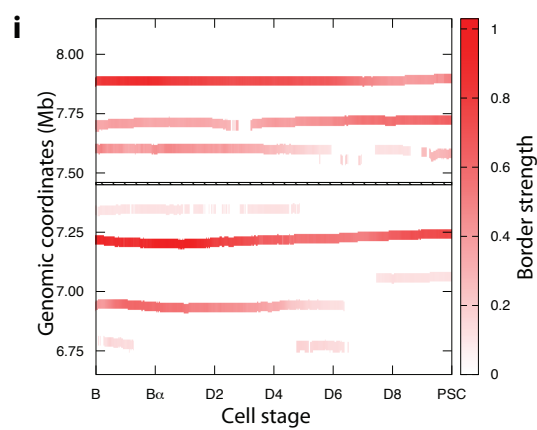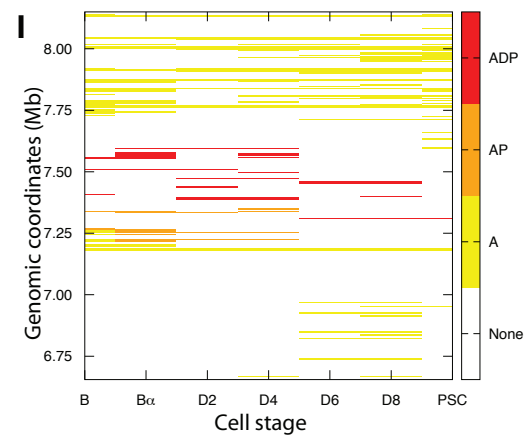

**m**

| TSS | B  | B $\alpha$ | D2 | D4 | D6 | D8 | PSC |
|-----|----|------------|----|----|----|----|-----|
| A   | 43 | 39         | 25 | 35 | 34 | 48 | 43  |
| AP  | 7  | 16         | 9  | 12 | 3  | 4  | 1   |
| APD | 4  | 8          | 6  | 8  | 3  | 4  | 1   |
