# Supplementary material for: Dynamic simulations of transcriptional control during cell reprogramming reveal spatial chromatin caging
Source: bioRxiv or medRxiv preprint supplement (doi:10.1101/642009), 2019-05-20
Supplement: Supplementary file [file media-5.pdf]

# Mmp12 chr9:7344381-7369499. Forward

**a**

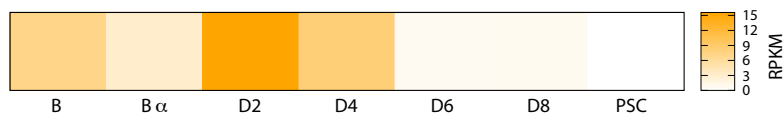

**b**

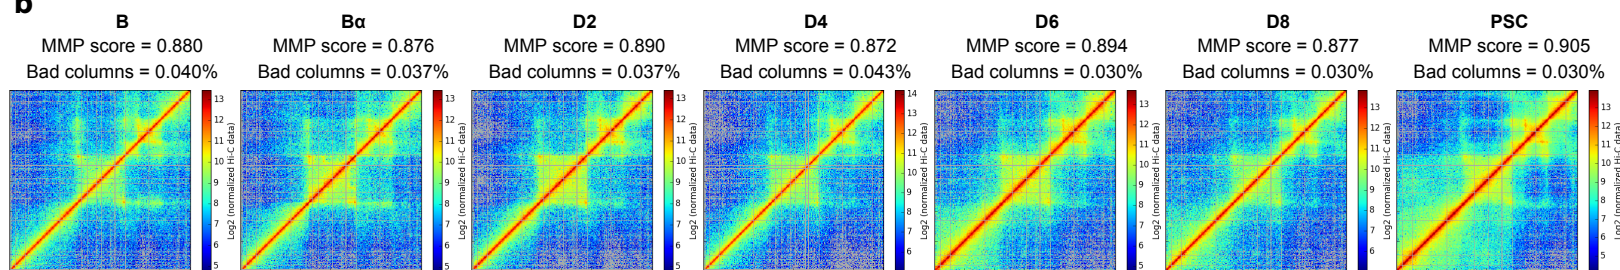

**c**

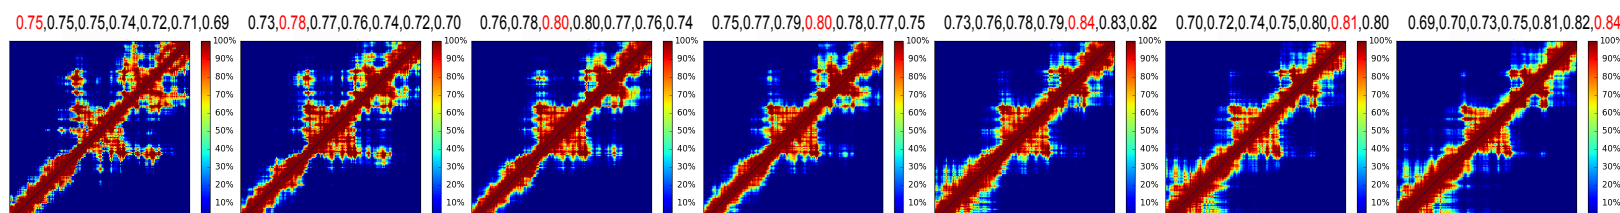

**d**

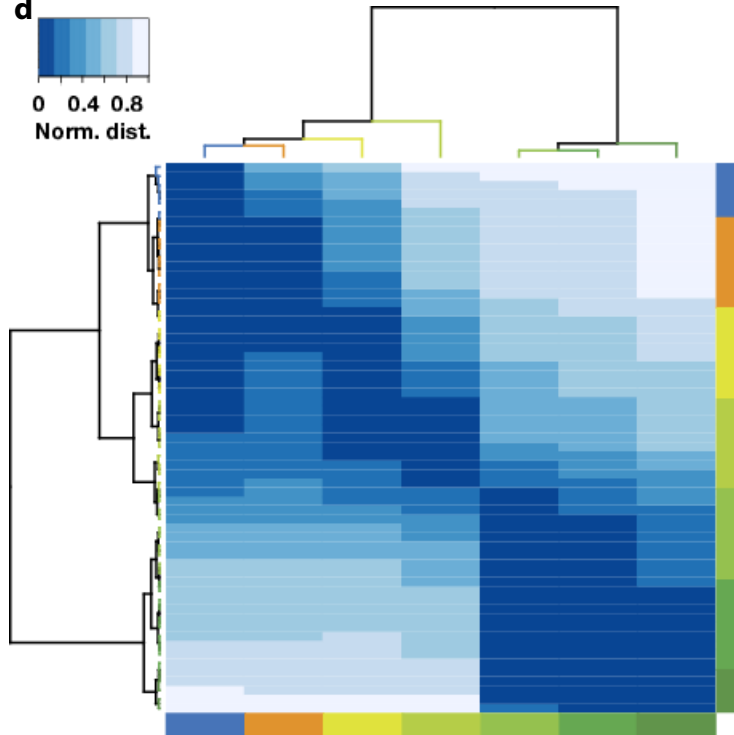

**e**

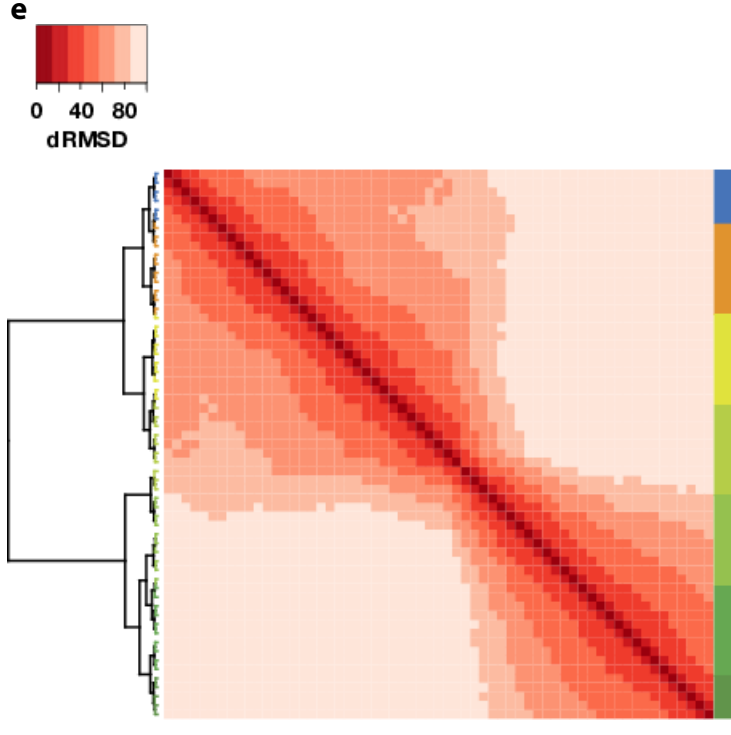

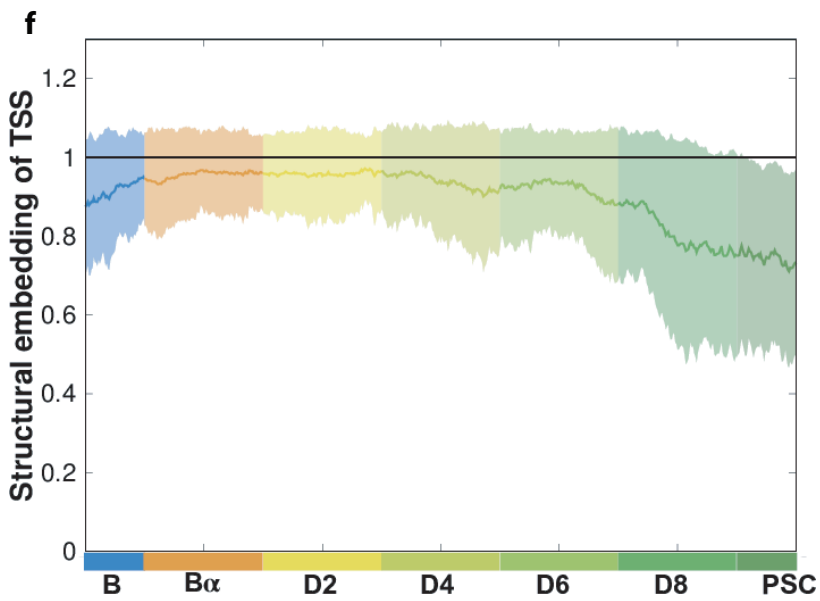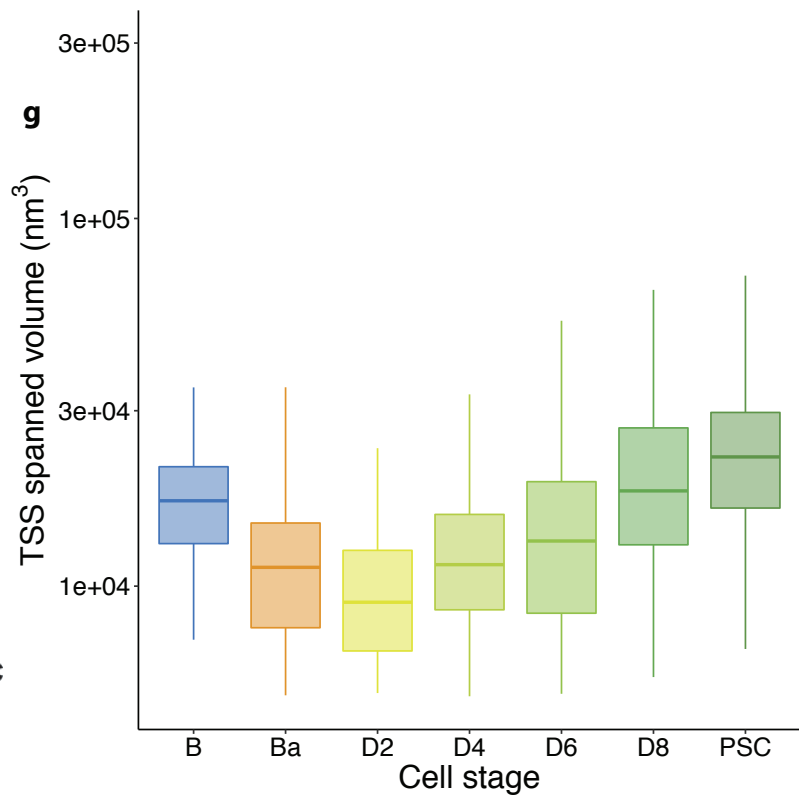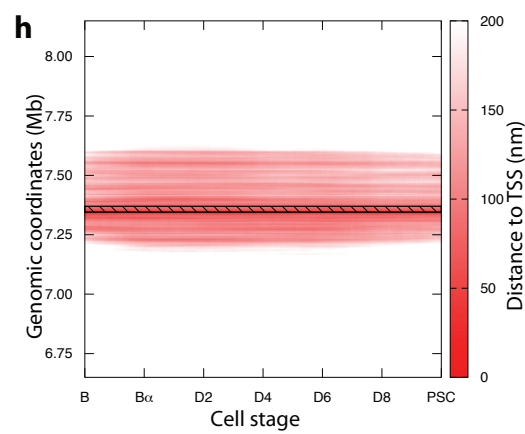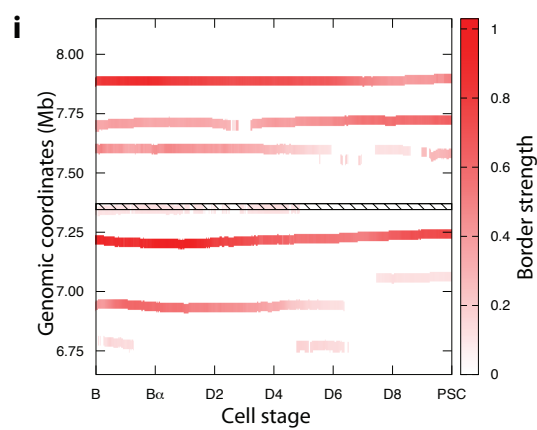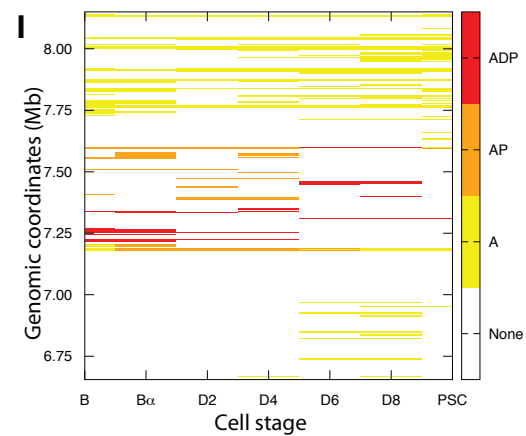

**m**

| TSS | B  | B $\alpha$ | D2 | D4 | D6 | D8 | PSC |
|-----|----|------------|----|----|----|----|-----|
| A   | 45 | 40         | 26 | 36 | 36 | 49 | 43  |
| AP  | 14 | 22         | 13 | 16 | 7  | 5  | 2   |
| APD | 8  | 8          | 3  | 4  | 5  | 5  | 1   |
