# Supplementary material for: Dynamic simulations of transcriptional control during cell reprogramming reveal spatial chromatin caging
Source: bioRxiv or medRxiv preprint supplement (doi:10.1101/642009), 2019-05-20
Supplement: Supplementary file [file media-6.pdf]

# Nanog chr6:122707565-122714633. Forward

**a**

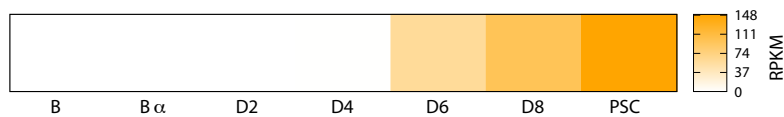

**b**

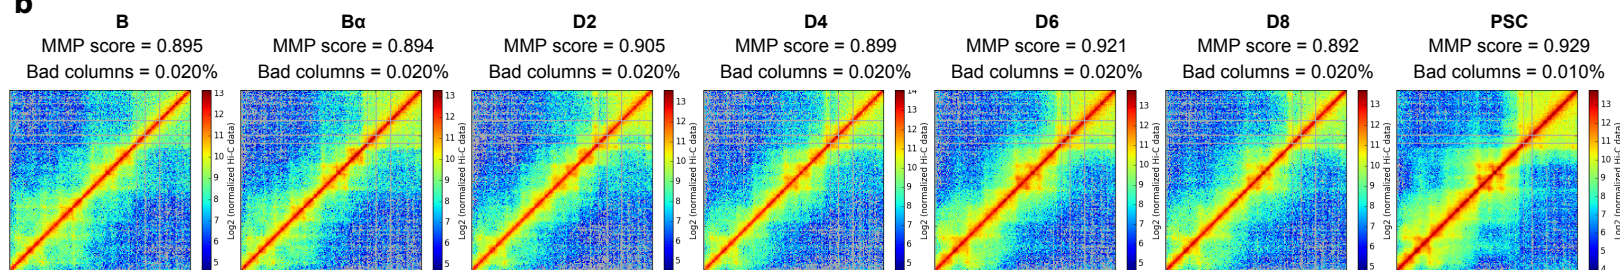

**c**

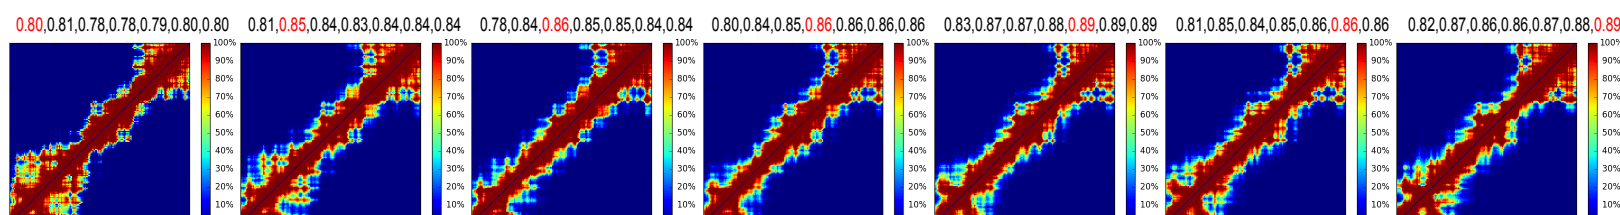

**d**

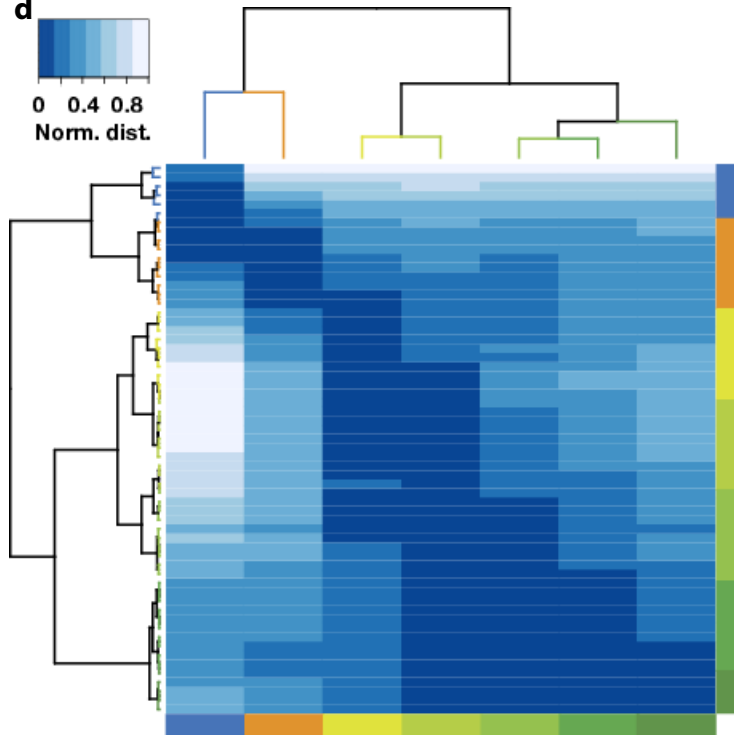

**e**

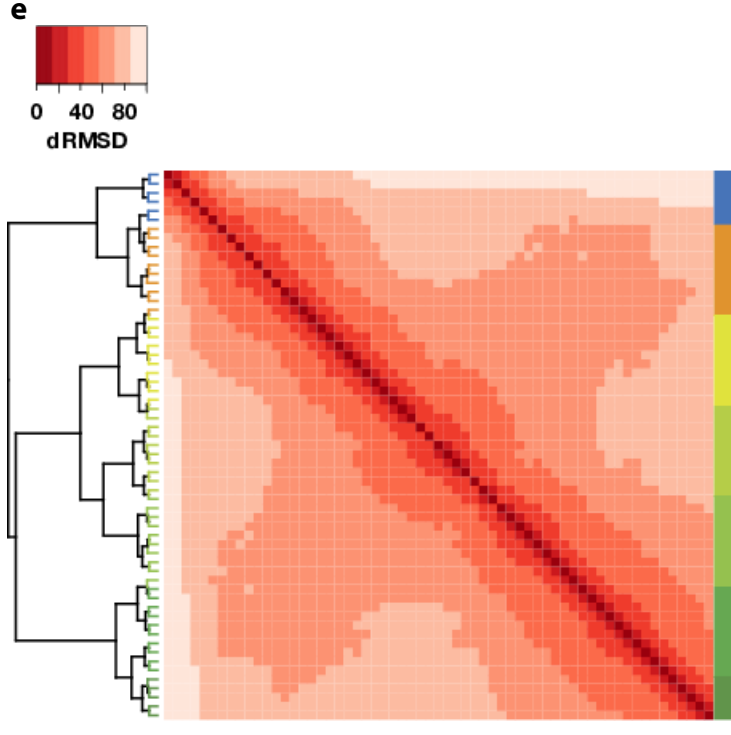

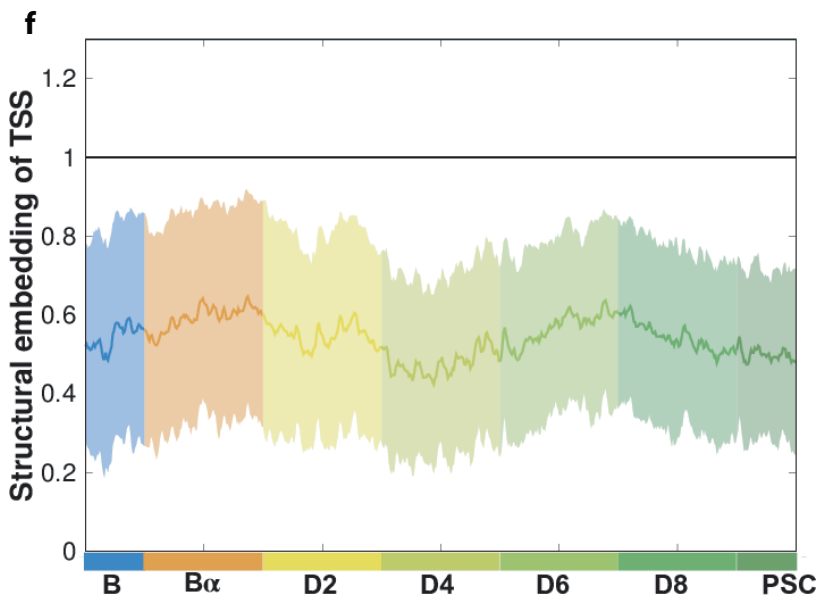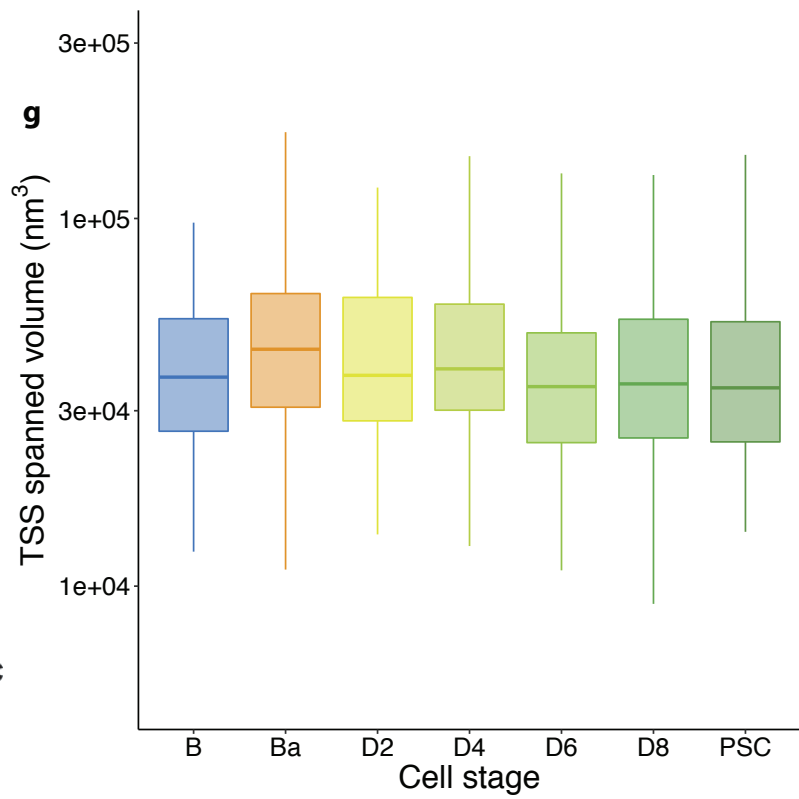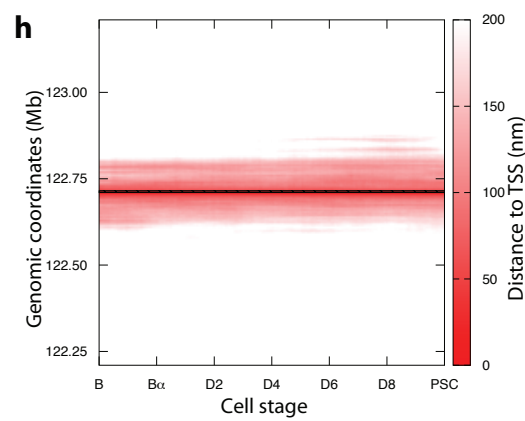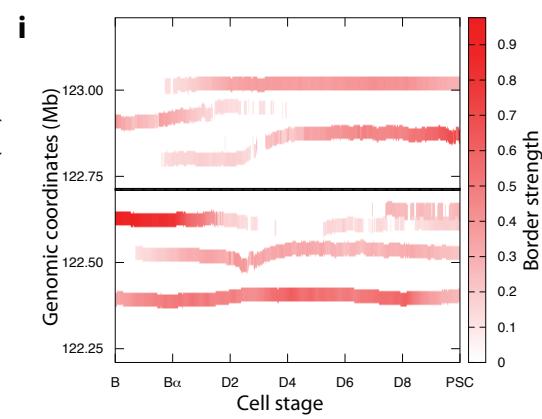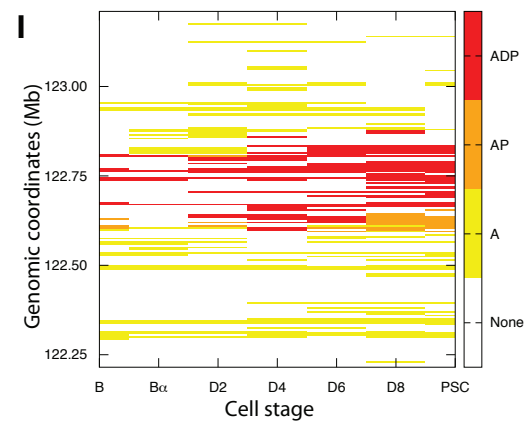

**m**

| TSS | B  | B $\alpha$ | D2 | D4 | D6 | D8 | PSC |
|-----|----|------------|----|----|----|----|-----|
| A   | 30 | 32         | 47 | 54 | 51 | 68 | 62  |
| AP  | 11 | 5          | 14 | 23 | 25 | 36 | 36  |
| APD | 8  | 5          | 11 | 23 | 23 | 27 | 27  |
