# Supplementary material for: Dynamic simulations of transcriptional control during cell reprogramming reveal spatial chromatin caging
Source: bioRxiv or medRxiv preprint supplement (doi:10.1101/642009), 2019-05-20
Supplement: Supplementary file [file media-7.pdf]

# Nos1ap chr1:170302668-170589861. Reverse

**a**

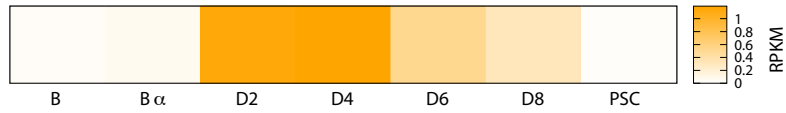

**b**

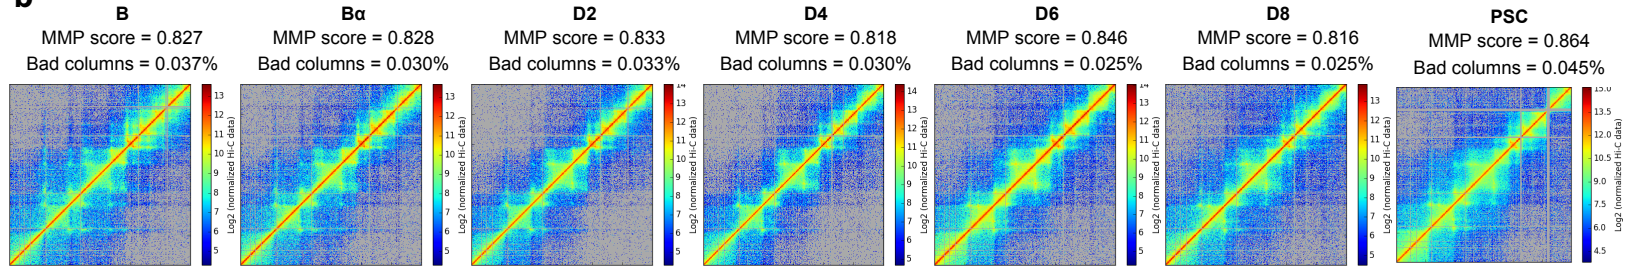

**c**

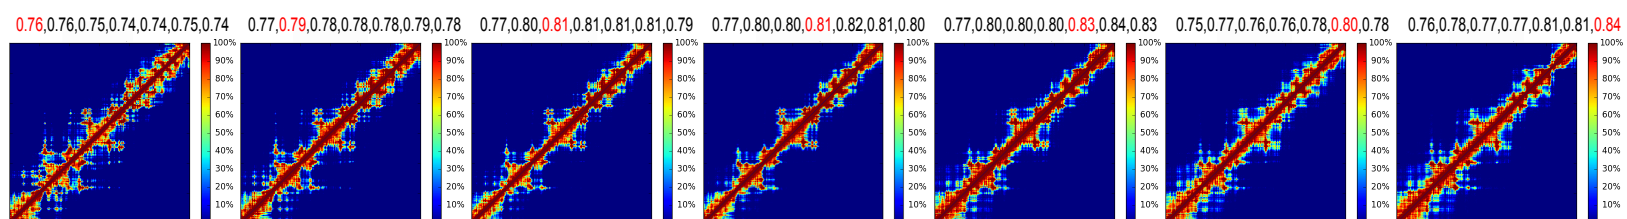

**d**

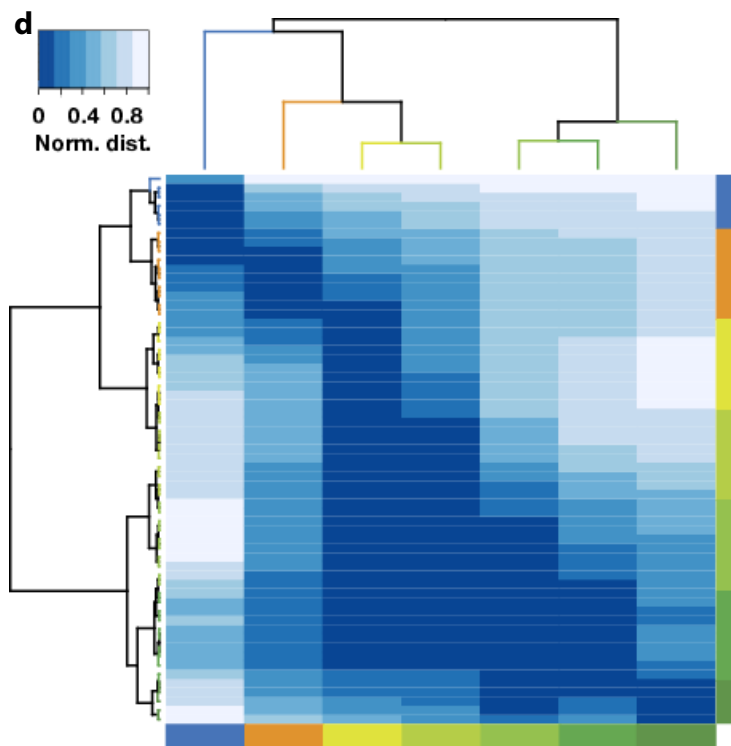

**e**

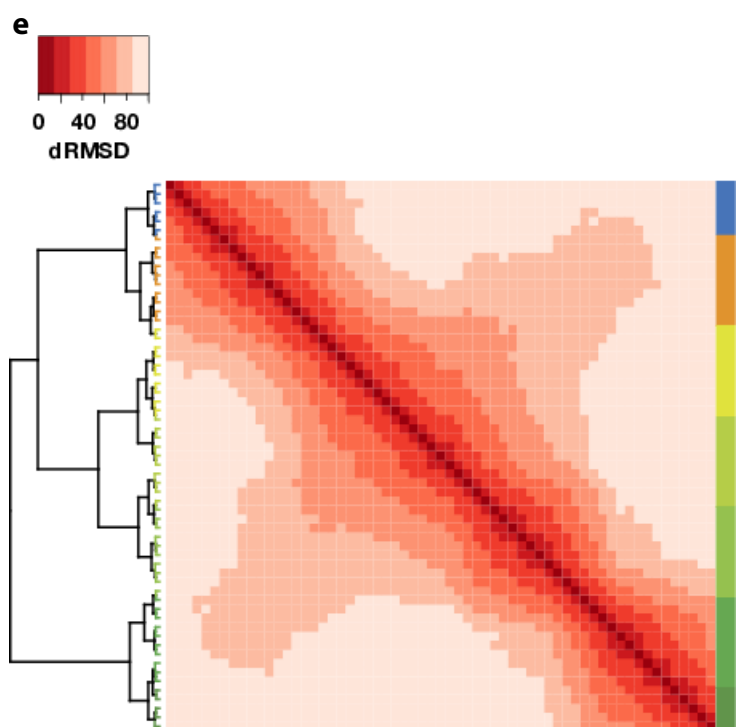

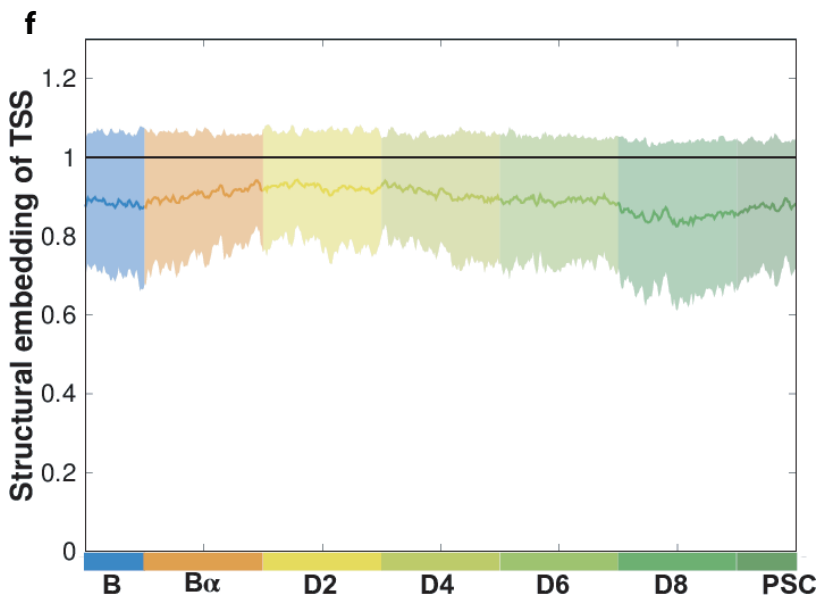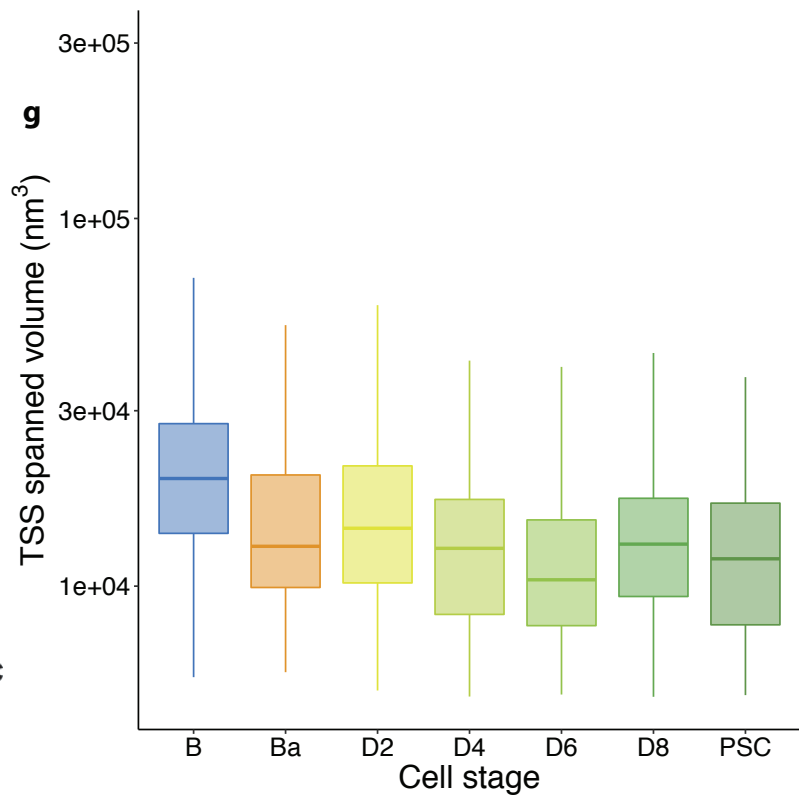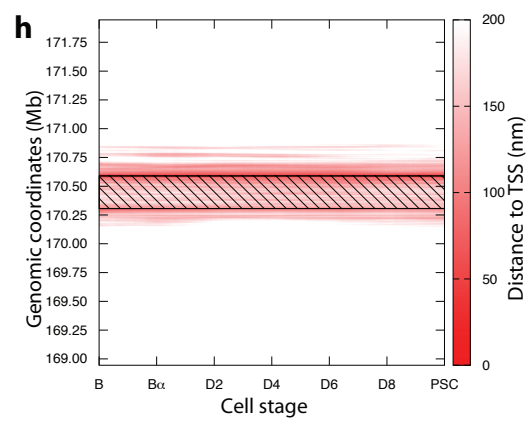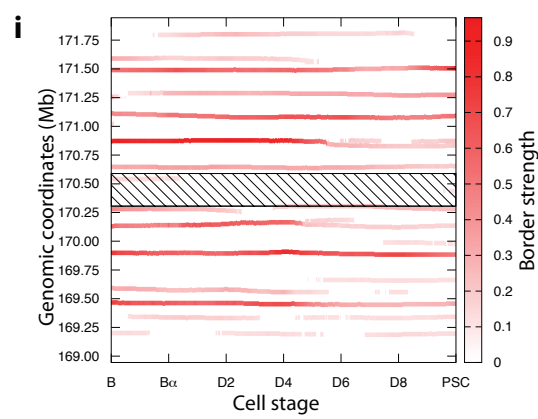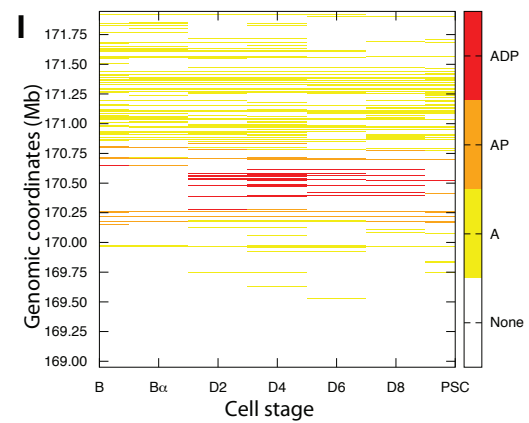

**m**

| TSS | B   | B $\alpha$ | D2  | D4  | D6  | D8 | PSC |
|-----|-----|------------|-----|-----|-----|----|-----|
| A   | 113 | 100        | 108 | 144 | 100 | 93 | 96  |
| AP  | 16  | 13         | 21  | 32  | 19  | 18 | 16  |
| APD | 3   | 2          | 14  | 22  | 13  | 9  | 4   |
