# Supplementary material for: Dynamic simulations of transcriptional control during cell reprogramming reveal spatial chromatin caging
Source: bioRxiv or medRxiv preprint supplement (doi:10.1101/642009), 2019-05-20
Supplement: Supplementary file [file media-8.pdf]

# Rad23a chr8:84834652-84840665. Reverse

**a**

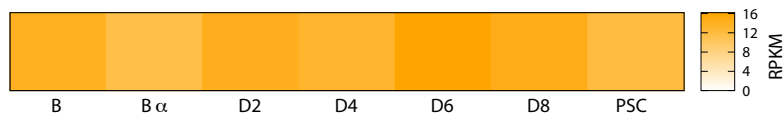

**b**

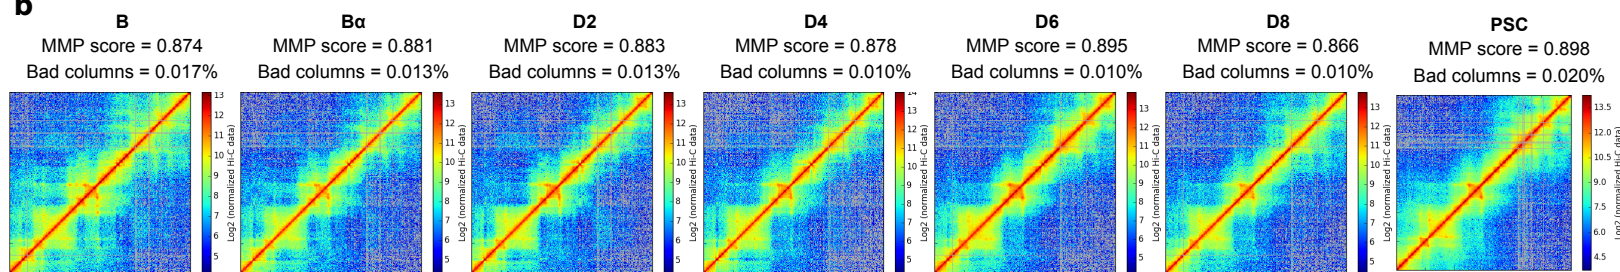

**c**

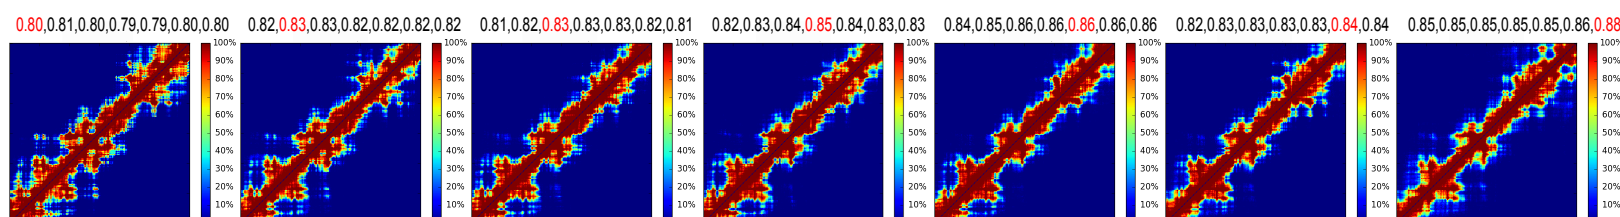

**d**

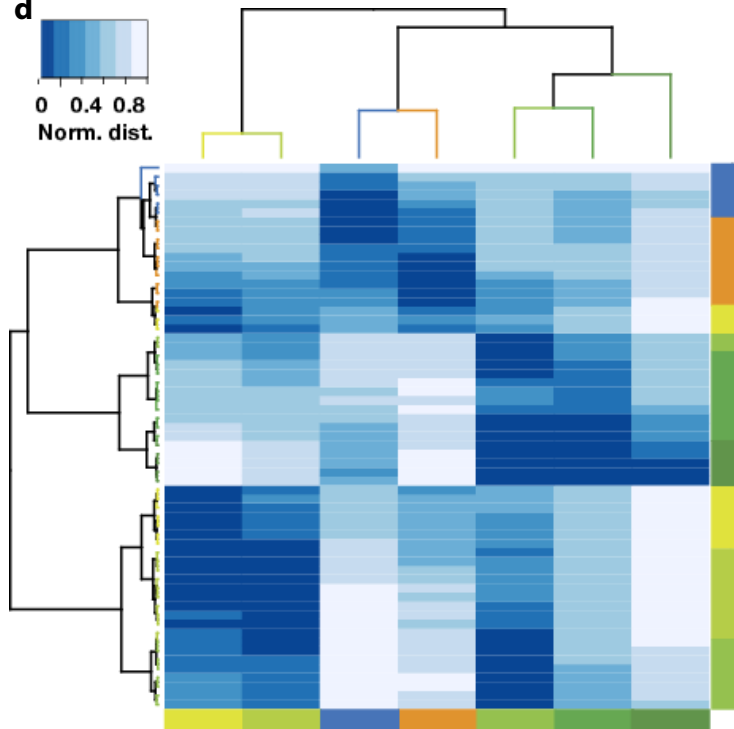

**e**

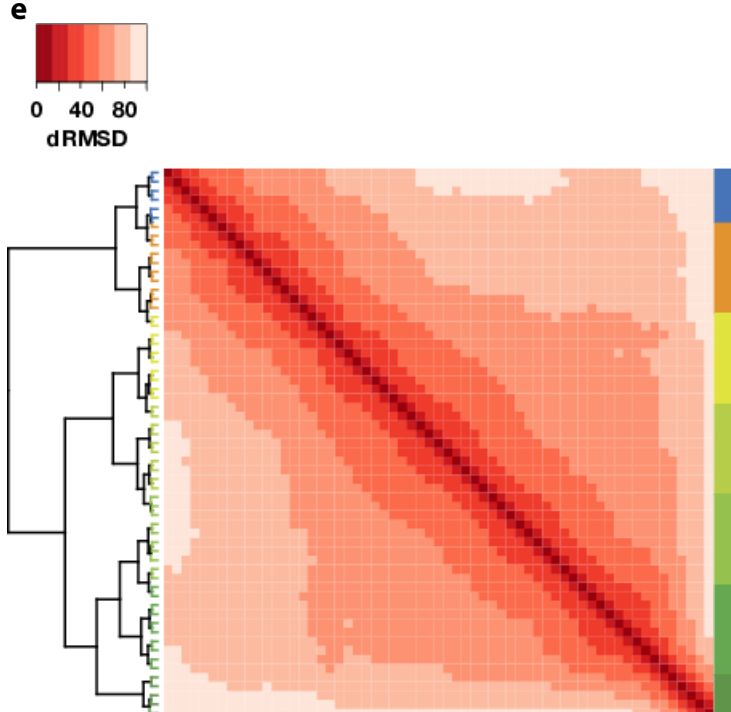

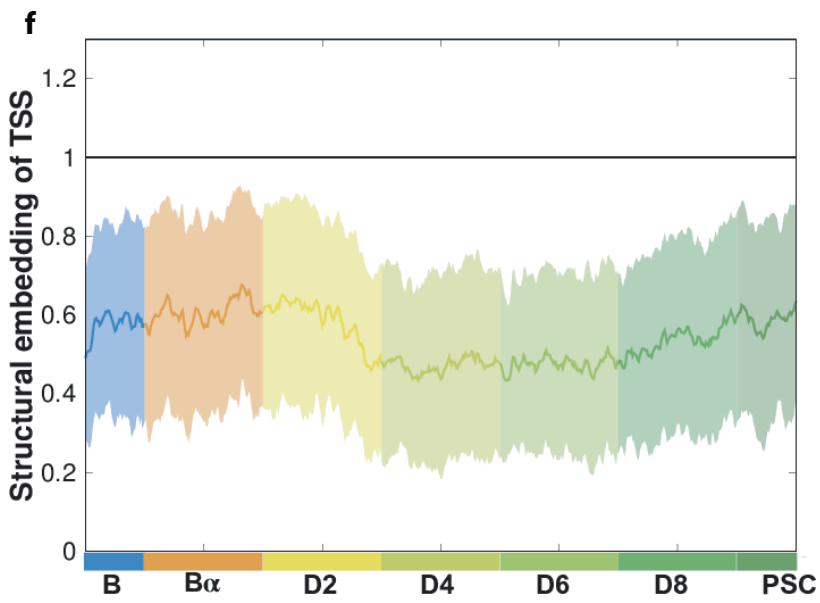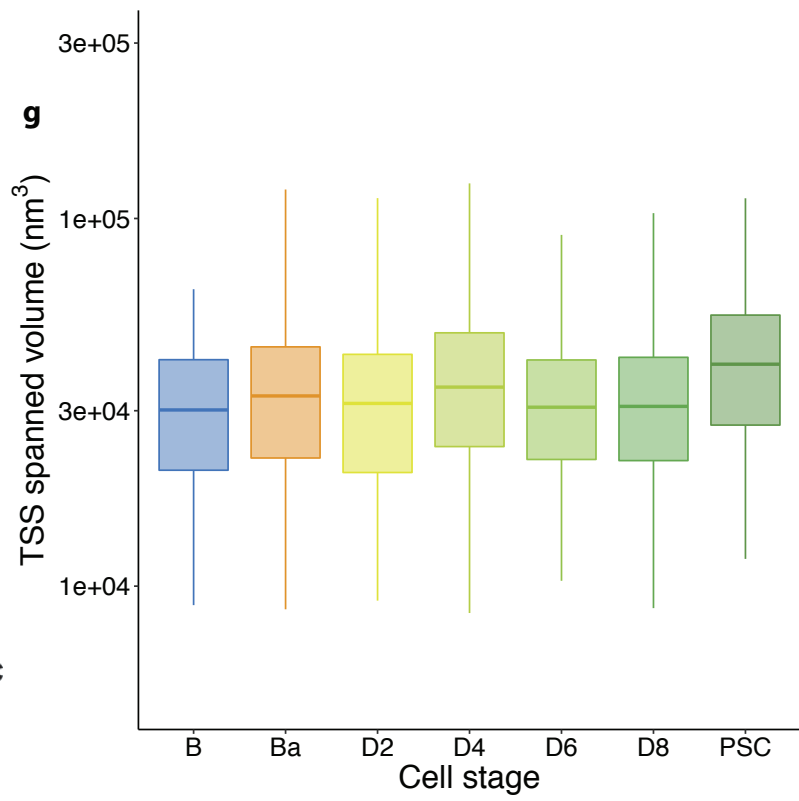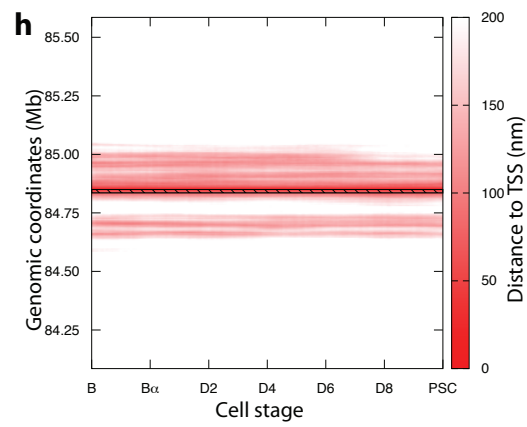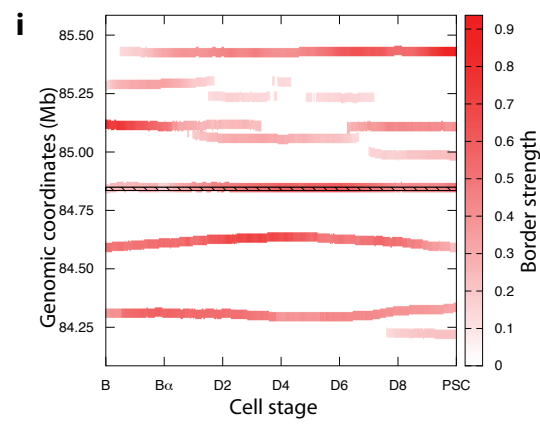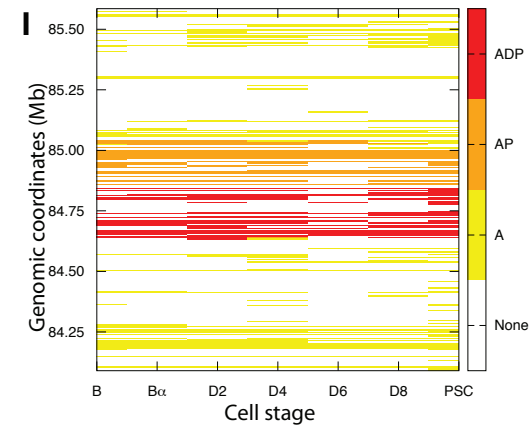

**m**

| TSS | B  | B $\alpha$ | D2 | D4 | D6 | D8 | PSC |
|-----|----|------------|----|----|----|----|-----|
| A   | 82 | 76         | 87 | 95 | 67 | 92 | 119 |
| AP  | 41 | 40         | 46 | 43 | 31 | 38 | 48  |
| APD | 18 | 19         | 25 | 21 | 14 | 20 | 28  |
