# Supplementary material for: Dynamic simulations of transcriptional control during cell reprogramming reveal spatial chromatin caging
Source: bioRxiv or medRxiv preprint supplement (doi:10.1101/642009), 2019-05-20
Supplement: Supplementary file [file media-9.pdf]

# Rad23b chr4:55350042-55392237. Forward

**a**

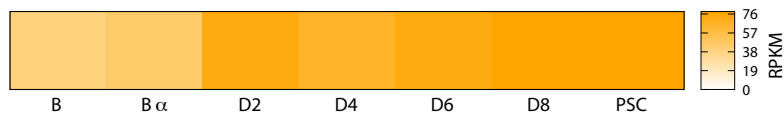

**b**

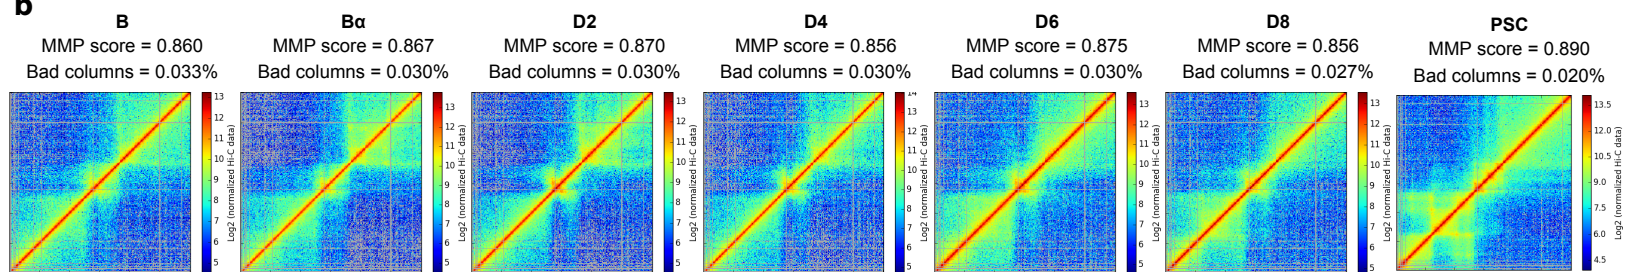

**c**

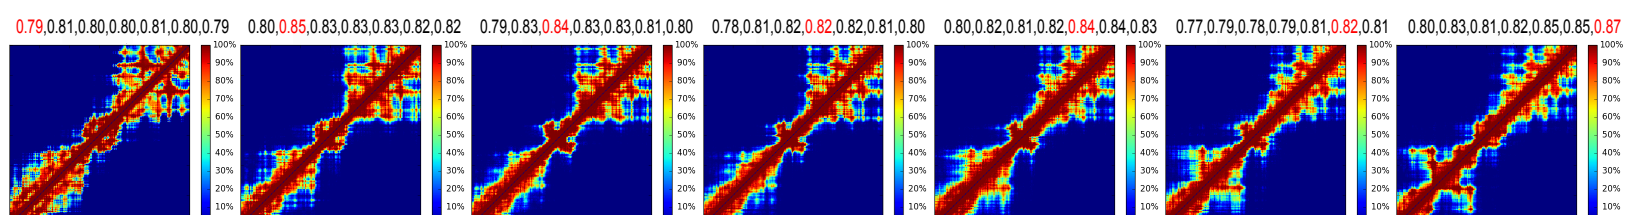

**d**

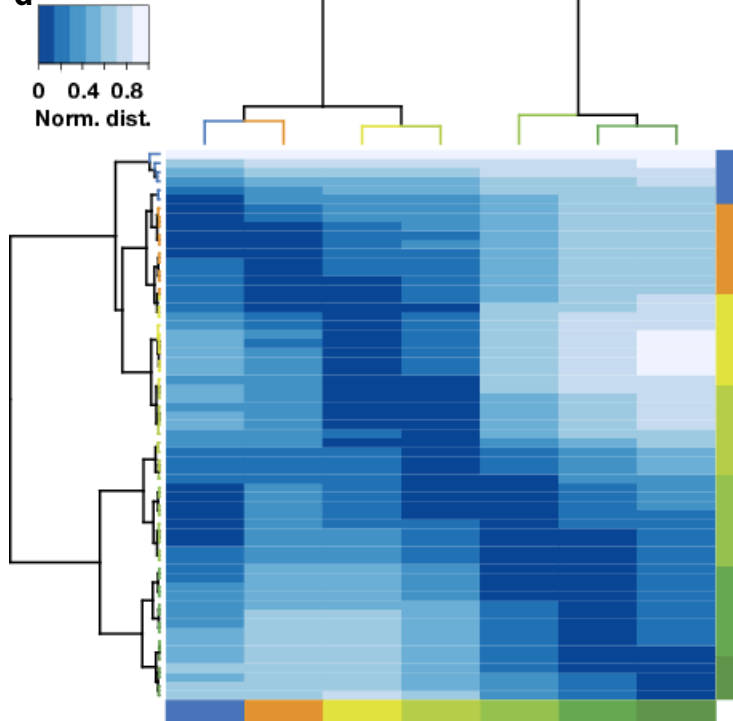

**e**

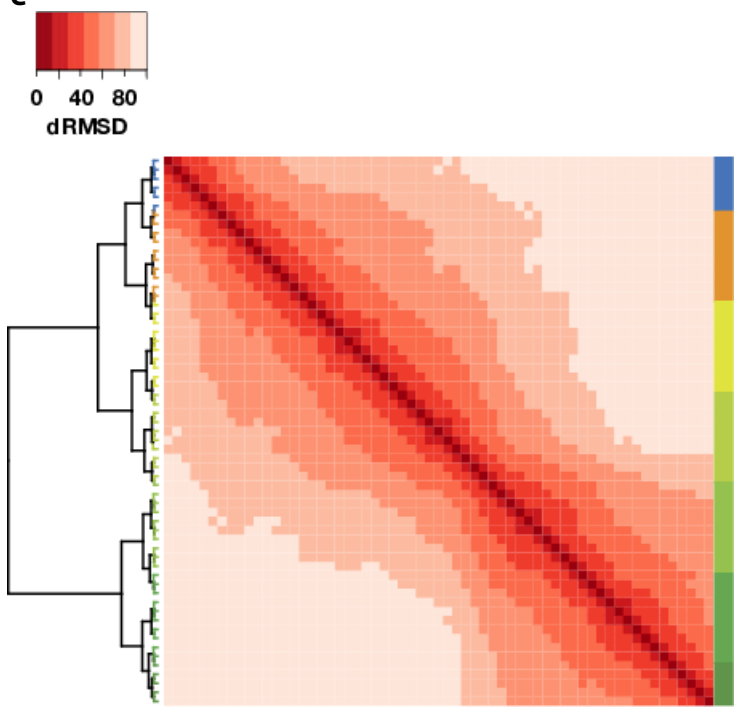

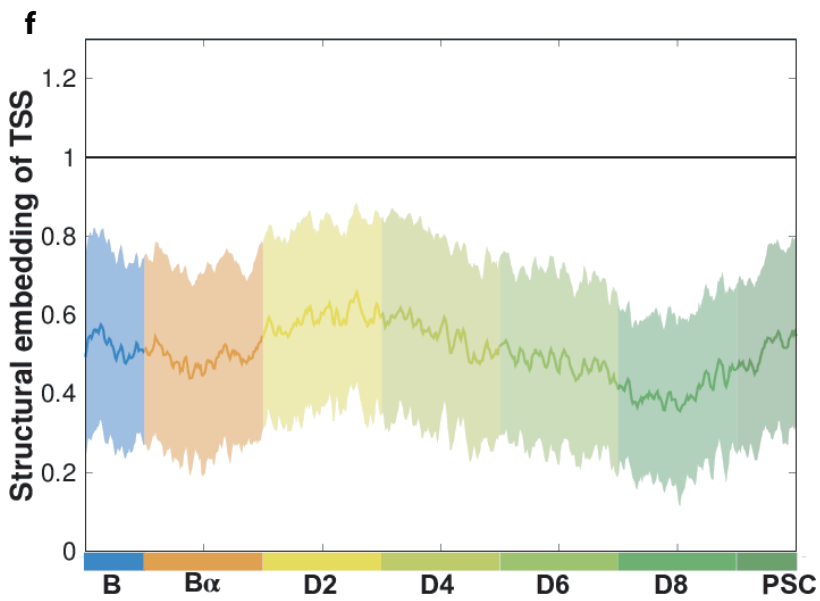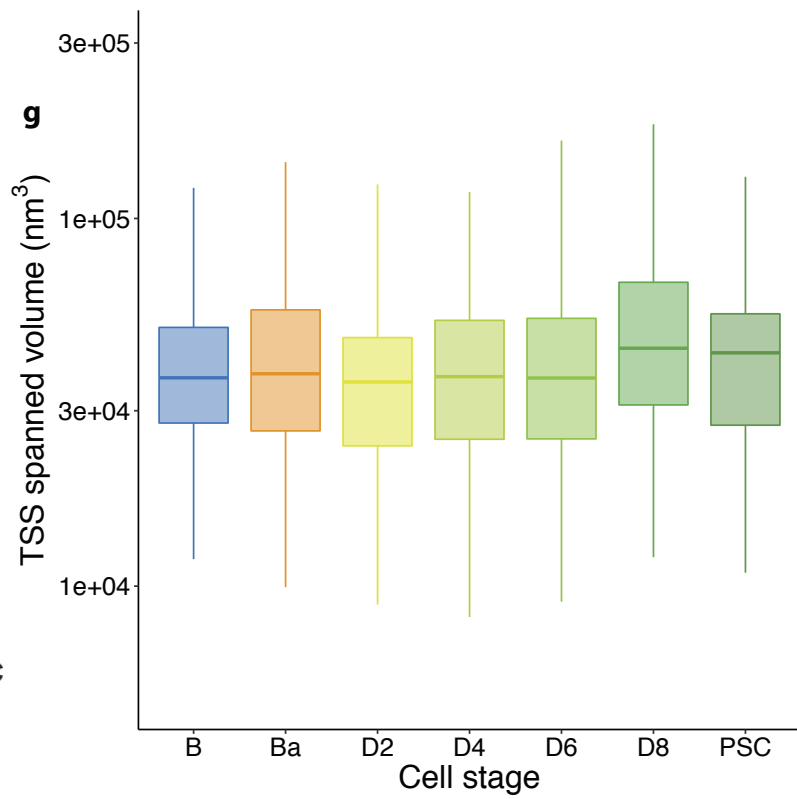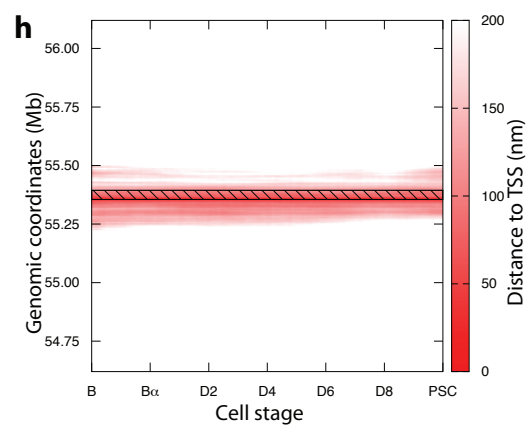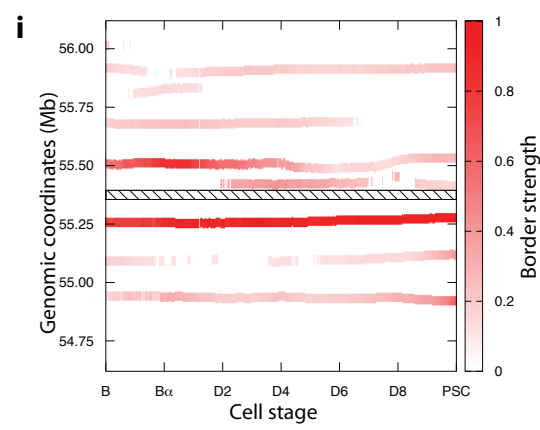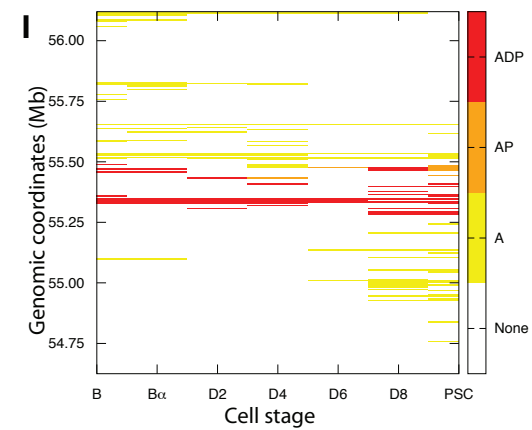

**m**

| TSS | B  | B $\alpha$ | D2 | D4 | D6 | D8 | PSC |
|-----|----|------------|----|----|----|----|-----|
| A   | 31 | 26         | 16 | 23 | 13 | 36 | 47  |
| AP  | 10 | 8          | 7  | 8  | 5  | 14 | 18  |
| APD | 10 | 8          | 7  | 7  | 4  | 14 | 12  |
