# Supplementary material for: Dynamic simulations of transcriptional control during cell reprogramming reveal spatial chromatin caging
Source: bioRxiv or medRxiv preprint supplement (doi:10.1101/642009), 2019-05-20
Supplement: Supplementary file [file media-10.pdf]

# Sox2 chr3:34649995-34652460. Forward

**a**

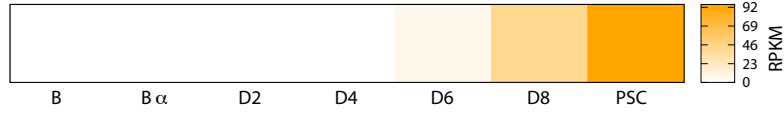

**b**

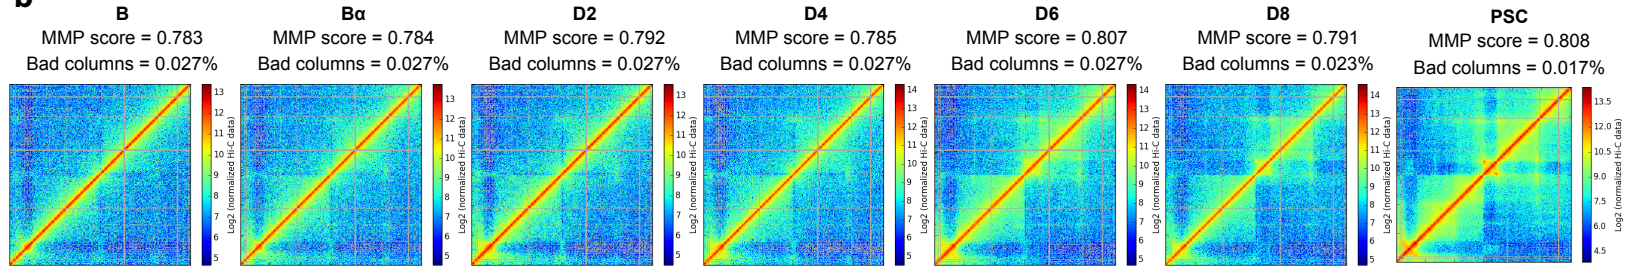

**c**

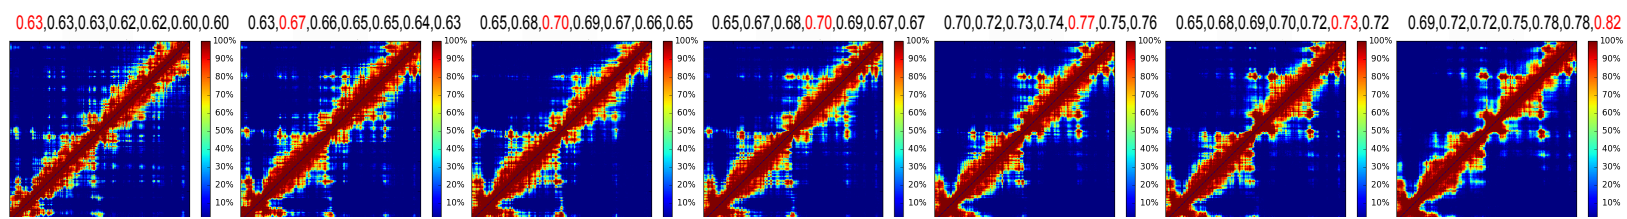

**d**

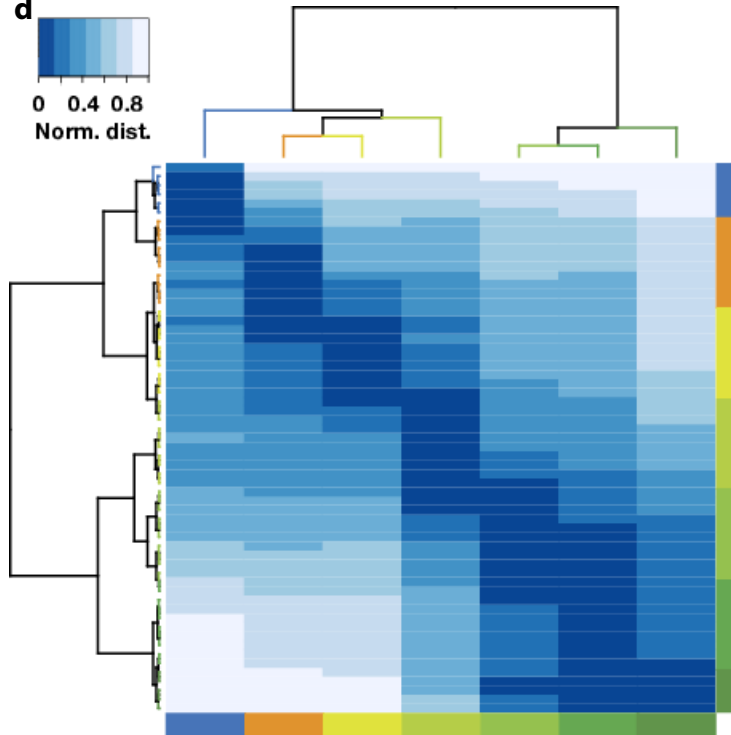

**e**

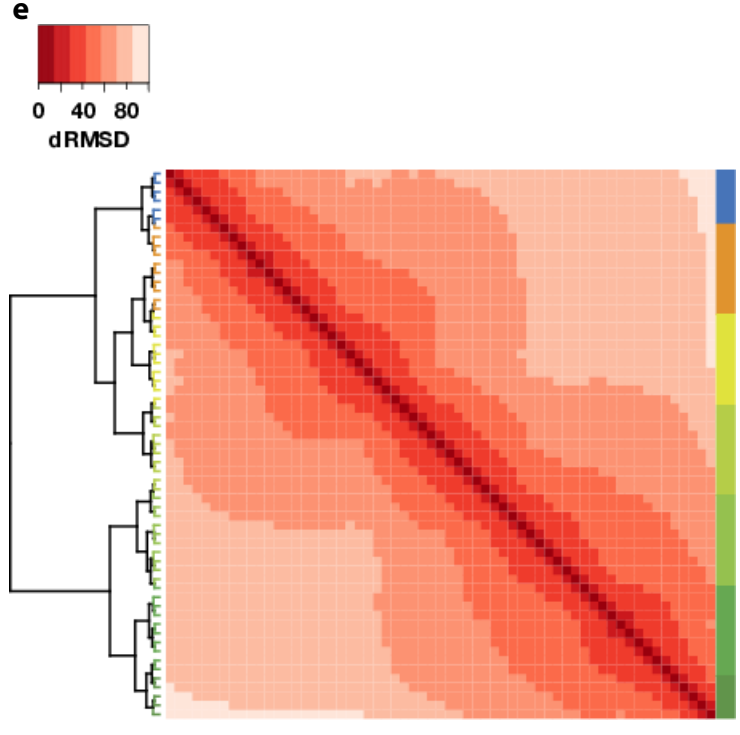

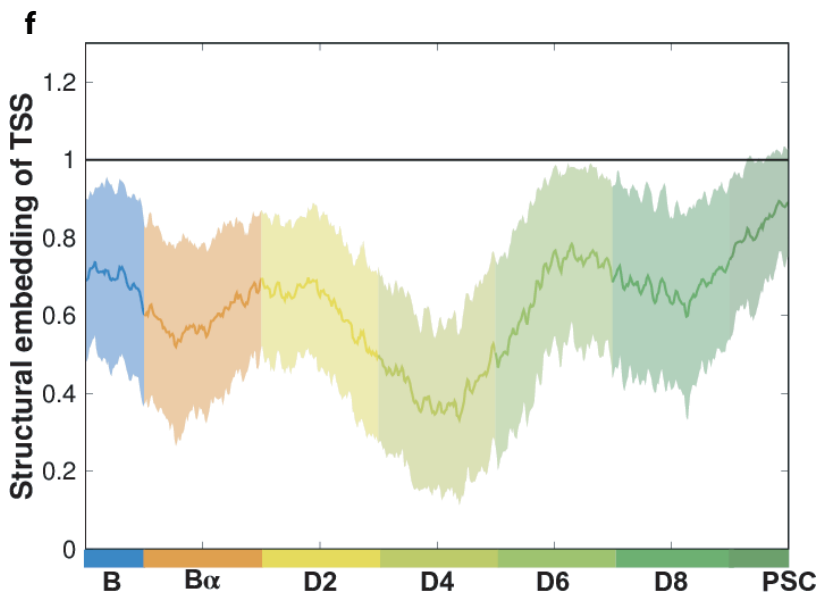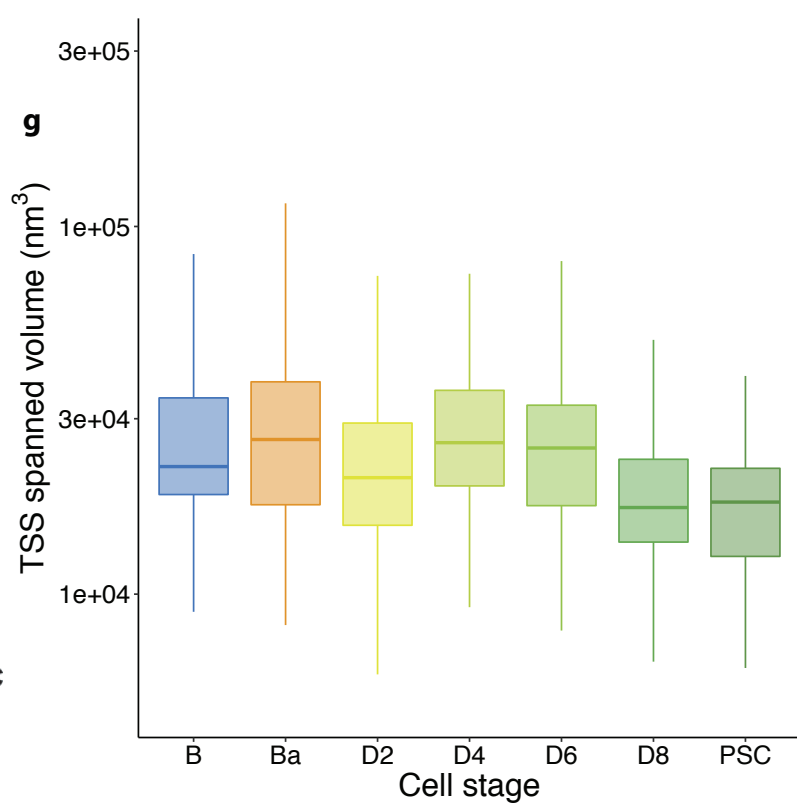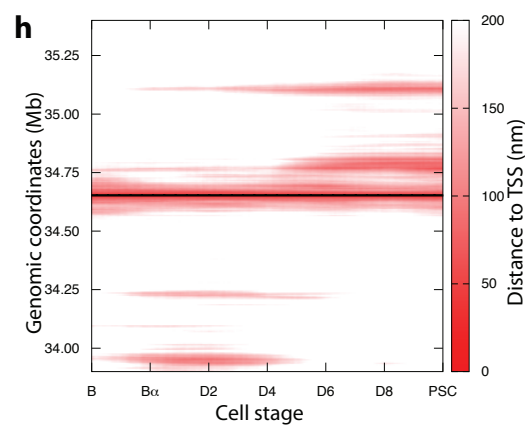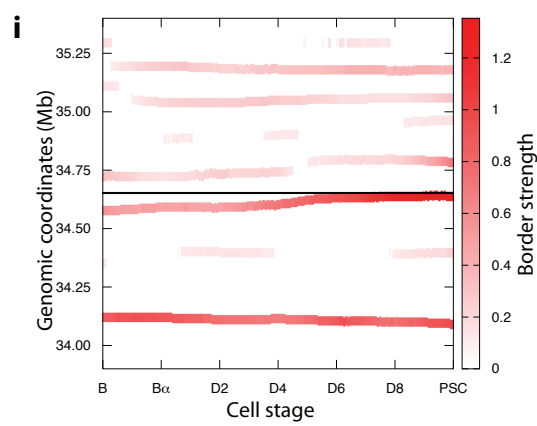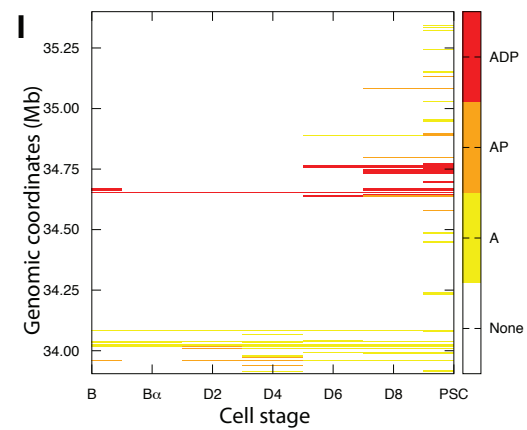

**m**

| TSS | B | B $\alpha$ | D2 | D4 | D6 | D8 | PSC |
|-----|---|------------|----|----|----|----|-----|
| A   | 9 | 6          | 7  | 13 | 13 | 22 | 48  |
| AP  | 4 | 1          | 4  | 4  | 4  | 13 | 23  |
| ADP | 3 | 1          | 1  | 1  | 4  | 10 | 15  |
