# Supplementary material for: Dynamic simulations of transcriptional control during cell reprogramming reveal spatial chromatin caging
Source: bioRxiv or medRxiv preprint supplement (doi:10.1101/642009), 2019-05-20
Supplement: Supplementary file [file media-11.pdf]

# Tet2 chr3:133463679-133545139. Reverse

**a**

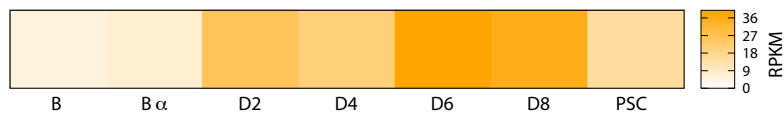

**b**

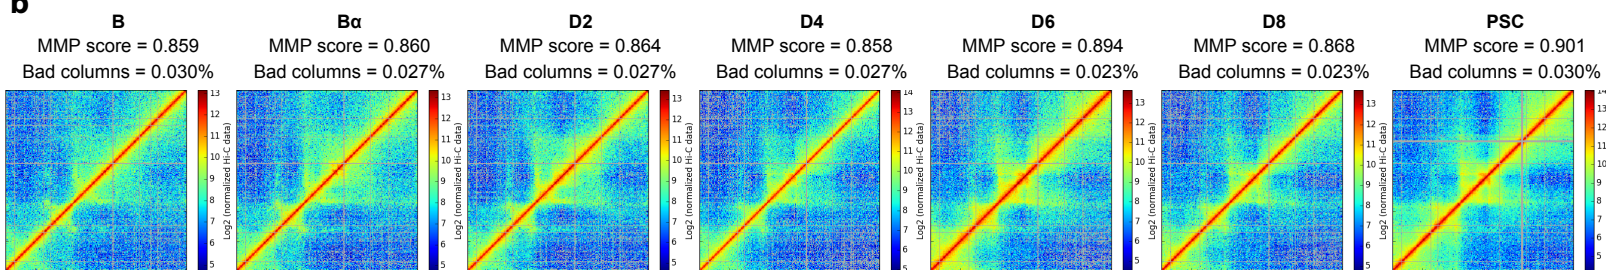

**c**

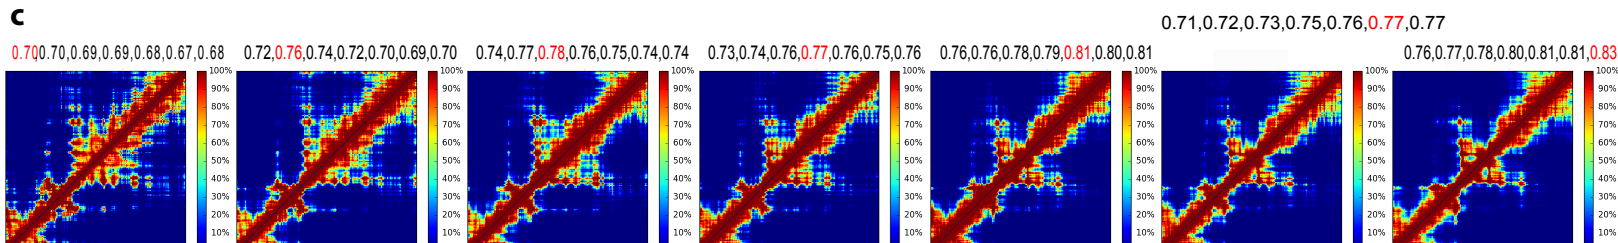

**d**

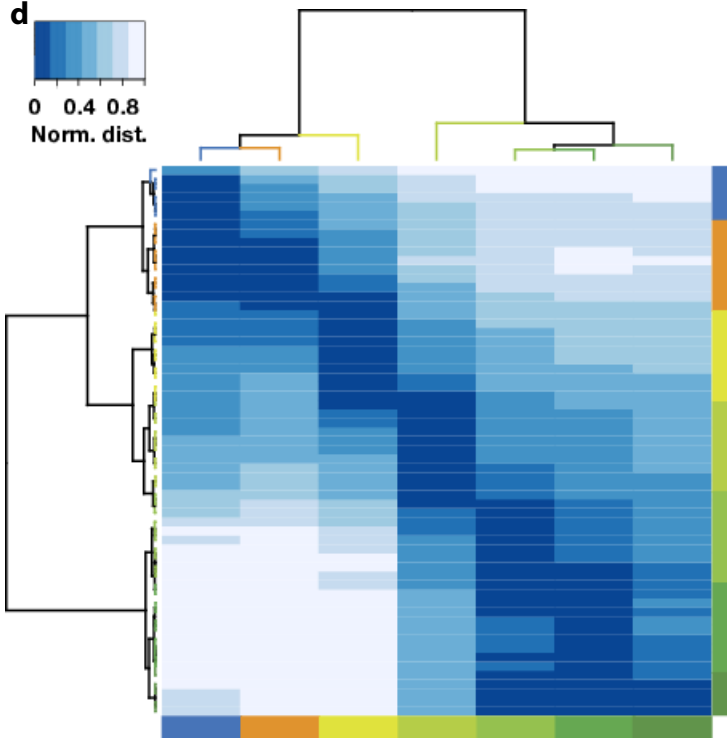

**e**

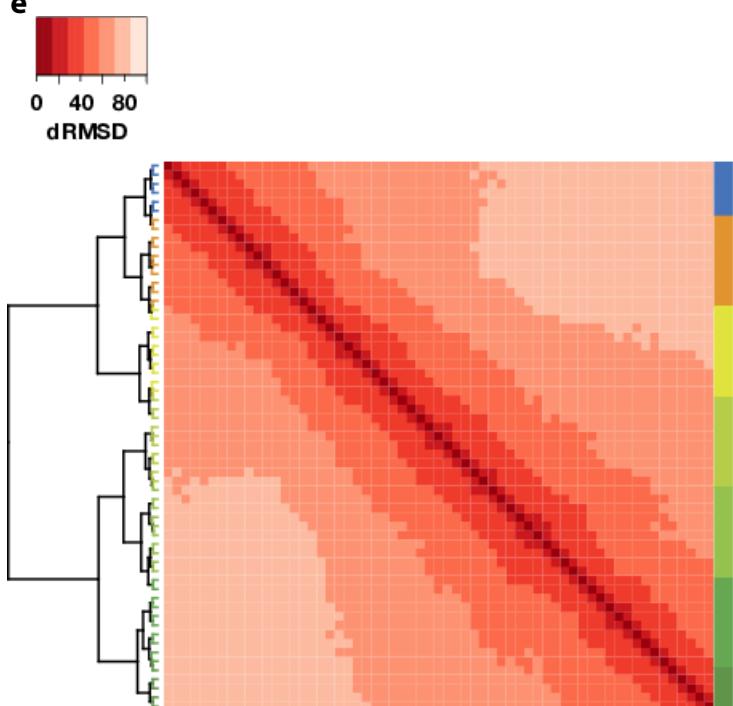

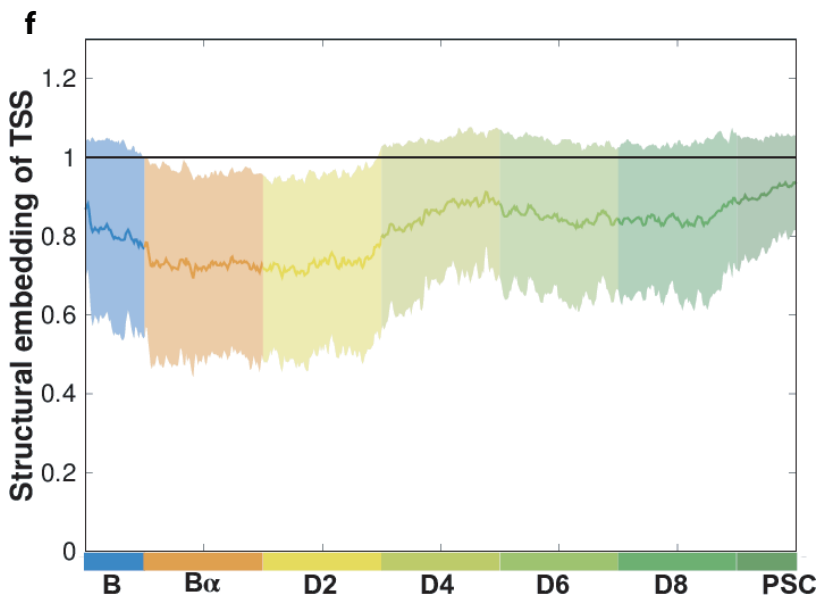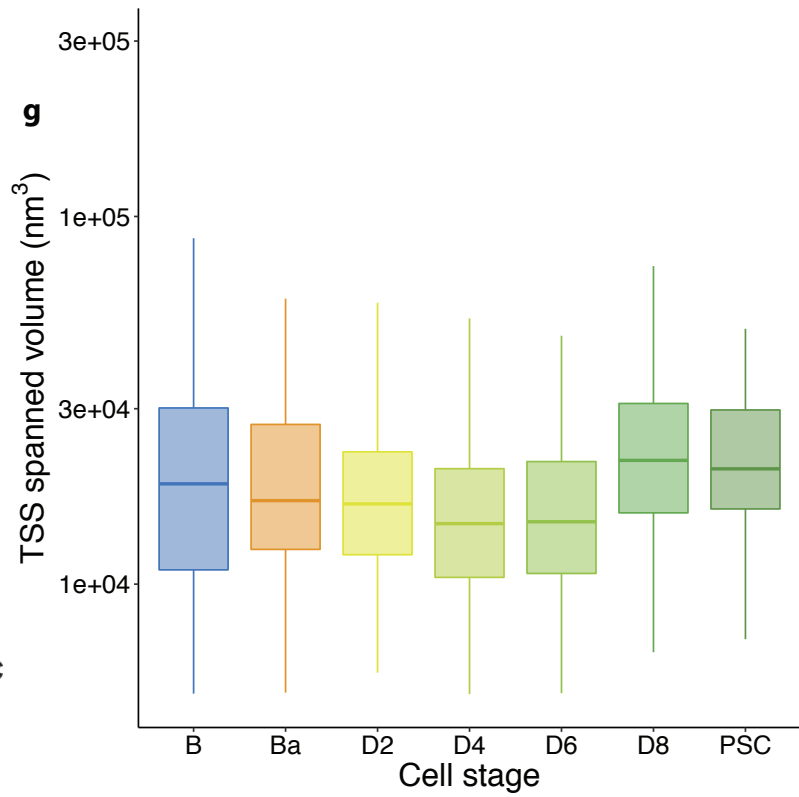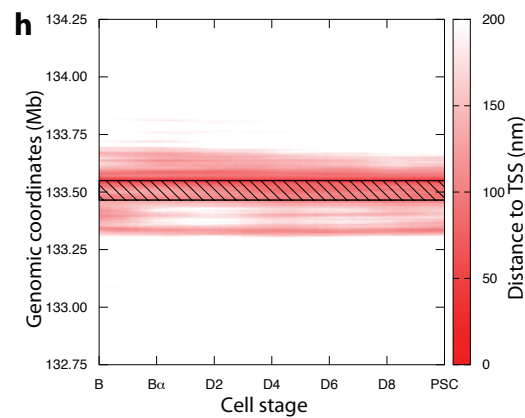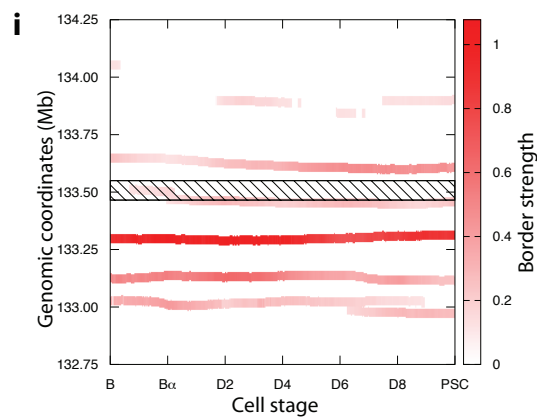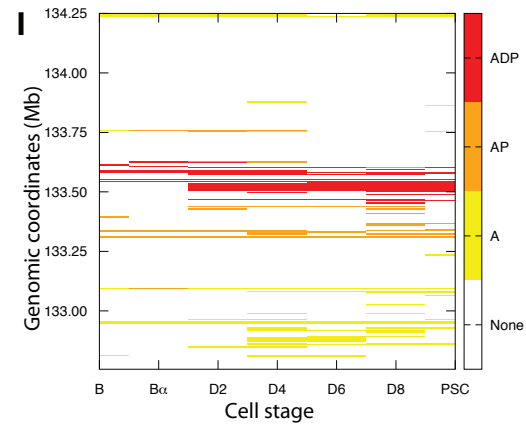

**m**

| TSS | B  | B $\alpha$ | D2 | D4 | D6 | D8 | PSC |
|-----|----|------------|----|----|----|----|-----|
| A   | 18 | 17         | 31 | 47 | 32 | 45 | 37  |
| AP  | 11 | 13         | 24 | 25 | 18 | 29 | 21  |
| APD | 5  | 7          | 15 | 15 | 13 | 18 | 15  |
